# Supplementary material
Source: publisher figshare collection journal article supplement (https://tandf.figshare.com/ndownloader/files/14118260)
Supplement: Supplementary file 1 [file 14118260]

Supporting Information

A practical access to new pyrrolizine carboxylates via KHMDS-catalysed carbocyclisations

Muhammet Yildirima *, Garba Suleimanb

Address:a * Department of Chemistry, Faculty of Arts and Sciences, Bolu Abant İzzet Baysal University, 14030, Bolu, TURKEY.

b Faculty of Science, Department of Chemistry, Yobe State University, P.M.B. 1144,Damaturu, Yobe State, NIGERIA.

Email: Assoc.Prof.Muhammet YILDIRIM – muhammetyildirim@ibu.edu.tr

* Corresponding author

**General procedures, experimental details, 1H-, 13C-NMR and HRMS data of precursors and spectra for precursors (3a-f, 4a-t) and products (5a-f, 6a-r and 6a’-r’)**

**General Remarks**

All the reactions were carried out under inert atmophere in flame-dried recation flasks and monitored with TLC precoated plates (60,F254,Merck 5735 and 5554). The precursors and the products were purified by CC using silica gel 60 (Merck-109385) or neutral alumina (Merck-101077) and the eluent was the mixtures of ethyl acetate (EA) and hexanes (H). All reagents, solvents were purchased from commercial suppliers with analytical grade (Merck, Sigma-Aldrich, TCI) and used as received. 1H- and 13C- NMR spectra were recorded on VARIAN NMR spectrometers (400 MHz for proton and 100 MHz for carbon) and a JEOL-ECS400 Delta2 NMR spectrometer (400 MHz for proton and 100 MHz for carbon) spectrometer at ambient temperature. All chemical shifts (δ) are reported in parts per million (ppm) downfield from TMS; *J* values are given in Hz. The abbreviations used for NMR signals are: s =singlet, d =doublet, t =triplet, q =quartet, quint =quintet, sep =septet, hep=heptet, m =multiplet, dd= doublet of doublets, dq= doublet of quartets, td= triplet of doublets, qd=quartet of doublets, ddd= doublet of doublet of doublets, dtd= doublet of triplet of doublets, tdt= triplet of doublet of triplets, dddd= doublet of doublet of doublet of doublets. IR spectra were recorded on a SHIMADZU FTIR-8400S instrument using KBr or NaCl discs. HRMS were run on a Waters Lct Premier XE oa-TOF Mass Spectrometer. Specific rotations were run by a Rudolph Research Analytical Autopol I Automatic polarimeter. Melting points were determined on a MELTEMP apparatus and are uncorrected.

**General Procedure for the Preparation of *N*-propargyl proline esters (3a-f)**

**Method A– Step 11**

To a stirred suspension of *L*-proline **1** (5.1mmol) in alcohol (20 mL) at 0oC was added thionyl chloride (5.5mmol) dropwise over 20min, the resulting mixture was refluxed for 8 h. After completion of the reaction, the solvent was removed in vacuo to afford **2**(5.6mmol) as a hydrochloric salt which was then dissolved in 10mL of DCM under inert atmosphere before triethylamine (10.2mmol) and propargyl bromide (8.4mmol) were added at 0oC. The reaction mixture was stirred at same temperature for1 h, then at room temperature overnight. After the disappearance of the starting materials as indicated by TLC, the reaction was quenched with water (10ml), extracted with DCM (2×20mL), washed with H2O, sat. NaHCO3 solution and brine. The combined organics were dried over Na2SO4 and concentrated in vacuo to give *N*-propargyl esters **3** as oily products. The products was used in the next step without further purification.

**General Procedure for Synthesis of *N*-alkynyl substituted proline esters (4a-i) via Sonogashira coupling**

**Method A –Step 22, 3**

To a stirred suspension of proline ester **3** (5.0 mmol), Pd(PPh3)4 (5mmol%) in DIPA (5 ml), under an inert atmosphere, was added CuI (5mmol%) and 4-iodophenyl derivative (5.0 mmol)successively. After stirring at 50oC for 2-3 h under N2, the mixture was hydrolyzed with a saturated aqueous solution of ammonium chloride, extracted with diethyl ether and dried over Na2SO4.The compound was purified using silica gel column chromatography to afford the *N*-alkynyl substituted proline ester **4** in good to moderate yields.

**General Procedure for the Synthesis of *N*-alkynyl substituted proline esters (4j-t) via A3 coupling**

**Method B4, 5**

Formaldehyde (0.25 mmol, 1.25 equiv.), acetylene (0.25 mmol, 1.25 equiv.), sodium bicarbonate (0.2 mmol, 1 equiv.), and CuCl (0.02 mmol) were stirred for 18h with proline ester hydrochloride (**2**) (0.2 mmol) at 35°C under N2. Reaction mixture was diluted with ethyl acetate, eluted through a short plug of silica and Celite, dried over Na2SO4, filtered, and evaporated under reduced pressure. The compound was purified using silica gel column chromatography to afford the *N*-alkynyl substituted proline ester **4** in good to moderate yields.

**General Procedure for the Preparation of diiodo addition products (5a-f)**

A solution of compound **3** (1.0 mmol) in DCM (10 mL) at 0oC was stirred for 15 min and iodine (3.0 equiv.) was added into the solution under inert atmosphere. The resulting solution was warmed up to room temperature and reaction progress was controlled by TLC until the starting material was completely consumed. The reaction mixture was treated with a saturated solution Na2S2O3 and extracted with DCM (3x15 mL). Combined organic phases were washed with brine (15 mL). After drying over Na2SO4, the solvent was rotaevaporated and the residue was purified through a silica column using EtOAc/hexane (1:7) as an eluent to afford compound **5**.

**General Procedure for the Preparation of carbocyclisation products (6a-r)**

A solution of 0.5 M KHMDS (0.25 mmol) in toluene was added dropwise to a solution of *N*-propargyl proline ester (0.5 mmol) in dry toluene (5 mL) under inert atmosphere. The resulting solution was stirred at 0oC, then at room temperature until the starting material was completely consumed (about 0.5-1 hour). The solvent was rotaevaporated under reduced pressure and the residue was purified through neutral alumina column using EtOAc/hexane mixture as an eluent.

**Characterization Data for Precursor Compounds (3a-f, 4a-t)**

**Following Method A-Step 1;**

**Ethyl 1-(prop-2-yn-1-yl)pyrrolidine-2-carboxylate (3a):** Yield: 562 mg, 71%. Light yellow oil. Rf: 0.45 (33% EA/hexane). IR (KBr): νmax/cm-1 = 3290 (C≡C-H), 2978-2823(alip. CH), 2102 (C≡C), 1739 (ester C=O), 1639 (C-N), 1184 (C-O) cm-1; 1H NMR (400 MHz, CDCl3) δ4.21-4.13 (m, 2H), 3.60 (t, 2H, J = 2.4 Hz), 3.42-3.38 (dd, 1H, J = 9.2;6.4 Hz), 3.07-3.02 (m, 1H), 2.74-2.68 (m, 1H),2.19 (t, 1H, J = 2.2 Hz), 2.02-1.74 (m, 2H), 1.25 (t, 3H, J=7.2 Hz); 13C NMR (100 MHz, CDCl3) δ173.5 (ester C=O), 78.3(C≡C), 73.3(≡C-H), 62.5, 60.9, 52.3, 41.2, 29.6, 23.2, 14.3.HRMS (TOF-MS APCI+): MH+, found 182.1202. C10H16NO2requires 182.1181.

**Propyl 1-(prop-2-yn-1-yl)pyrrolidine-2-carboxylate (3b):** Yield: 800mg, 86%. Light yellow oil. Rf: 0.41 (33% EA/hexane).1H NMR (400 MHz, CDCl3) δ 4.14-4.03 (m, 2H),3.62-3.61 (t, 2H, J = 2.8 Hz),3.45-3.41 (dd, 1H, J = 8.4;6.0 Hz), 3.08-3.03 (m, 1H), 2.76-2.70 (q, 1H, J=8.8 Hz),2.21 (t, 1H, J=2.2 Hz), 2.19-2.13(m, 1H,),2.03-1.78 (m, 3H), 1.72-1.63 (sep, 2H, J=7.2 Hz), 0.94 (t, 3H, J=7.2 Hz); 13C NMR (100 MHz, CDCl3) δ 173.6 (ester C=O), 78.4(C≡C), 73.1(≡C-H), 66.3, 62.4, 52.1, 41.1, 29.5, 23.2, 22.0, 10.3.m/z (TOF-MS ES+) 196 (100, MH+), 194 (5); HRMS (TOF-MS ES+): MH+, found 196.1329. C11H18NO2requires 196.1338.

**Isopropyl 1-(prop-2-yn-1-yl)pyrrolidine-2-carboxylate (3c):** Yield: 742mg, 84%. pale yellow oil. Rf: 0.40 (33% EA/hexane).1H NMR (400 MHz, CDCl3) δ5.11-5.02 (hep,1H, J= 2.0 Hz), 3.64-3.62 (dd, 2H, J=3.6, 2.0), 3.42-3.38 (dd, 1H, J = 8.8;6.4 Hz), 3.10-3.05 (m, 1H),2.78-2.71 (q, 1H, J=8.8 Hz), 2.22 (t, 1H, J = 2.4 Hz), 2.21-2.09 (m, 1H), 2.01.-1.77 (m, 2H), 1.26 (t, 6H, J=6.0 Hz);13C NMR (100 MHz, CDCl3) δ 172.9 (ester C=O), 78.3(C≡C), 73.5(≡C-H), 68.5, 67.8, 62.5, 52.2, 41.1, 29.4, 23.0, 21.8.m/z (TOF-MS ES+) 196 (100, MH+), 154 (5); HRMS (TOF-MS ES+): MH+, found 196.1337. C11H18NO2requires 196.1338.

**Butyl 1-(prop-2-yn-1-yl)pyrrolidine-2-carboxylate (3d):** Yield:1004mg, quantitative. Pale yellow oil. Rf: 0.53 (33% EA/hexane).1H NMR (400 MHz, CDCl3) δ 4.11-3.98 (m,2H), 3.53-3.51 (dd, 2H, J=3.9, 2.4 Hz), 3.36-3.32 (dd, 1H, J = 9.0, 6.7 Hz), 3.02-2.93 (m, 1H), 2.68-2.61 (dd, 1H, J=16.6, 8.9 Hz), 2.14 (t, 1H, J = 2.4 Hz), 2.11-2.02 (dtd, 1H, J= 11.8, 8.9,6.9 Hz), 1.93.-1.69 (m, 3H), 1.60-1.49 (m, 2H),1.33-1.24 (dq, 2H, J=14.7, 7.4 Hz), 0.84 (3H, t, J=7.4 Hz);13C NMR (100 MHz, CDCl3) δ 173.5 (ester C=O), 78.3(C≡C), 73.2(≡C-H), 72.9, 64.6, 62.3, 52.5, 41.0, 30.6, 23.1, 19.1, 13.7. m/z (TOF-MS ES+) 210 (100, MH+), 208 (30), 189 (1); HRMS (TOF-MS ES+): MH+, found 210.1494. C12H20NO2 requires 210.1494.

**Sec-butyl 1-(prop-2-yn-1-yl)pyrrolidine-2-carboxylate (3e):** Yield: 501mg, 84%. Pale yellow oil. Rf: 0.54 (33% EA/hexane).1H NMR (400 MHz, CDCl3) δ 4.87-4.79 (m,2H), 3.56-3.54 (m, 2H, J=3.9, 2.4 Hz), 3.35-3.30 (dd, 1H, J = 9.0, 6.7 Hz), 3.02-2.95 (m, 1H), 2.69-2.63 (dd, 1H, J=17.1, 8.3 Hz), 2.16-2.13 (dt, 1H, J = 3.3, 1.7 Hz), 2.13-2.04 (m, 1H), 1.94.-1.68 (m, 3H), 1.61-1.42 (m, 2H),1.15 (t, 3H, J=6.2 Hz), 0.86-0.79 (3H, t, J=7.5, 3.5 Hz);13C NMR (100 MHz, CDCl3) δ173.4 (ester C=O), 78.3(C≡C), 73.2(≡C-H), 72.6, 62.6, 52.0, 40.9, 29.6, 28.9, 23.0, 19.7, 9.8. m/z (TOF-MS ES+) 210 (100, MH+), 208 (15); HRMS (TOF-MS ES+): MH+, found 210.1494. C12H20NO2 requires 210.1491.

**Methyl 1-(prop-2-yn-1-yl)pyrrolidine-2-carboxylate (3f):** Yield:3250mg, 85%.Yellow oil. Rf: 0.36 (33% ethyl acetate/hexane).IR (KBr): νmax/cm-1 = 3294 (C≡C-H), 2953-2821 (alip. CH), 2102 (C≡C), 1735 (ester C=O), 1437, 1174-1132(C-O) cm-1; 1H NMR (400 MHz, CDCl3) δ 3.66 (s, 3H), 3.53-3.51 (t, 2H, J=2.5 Hz), 3.38-3.34 (dd, 1H, J = 9.1, 6.7 Hz), 3.01-2.92 (m, 1H), 2.68-2.61 (td, 1H, J=9.0, 7.6 Hz), 2.15 (t, 1H, J = 2.4 Hz), 2.13-2.02 (m, 1H), 1.96-1.69 (m, 3H); 13C NMR (100 MHz, CDCl3) δ174.4 (ester C=O), 78.2 (C≡C), 73.3 (≡C-H), 62.4, 52.1, 51.9, 41.3 , 29.5, 23.2. HRMS (TOF-MS ES+): MH+, found 168.1018. C9H14NO2 requires 168.1025.

**Following Method A-Step 2;**

**Ethyl 1-(3-(4-methoxyphenyl)prop-2-yn-1-yl)pyrrolidine-2-carboxylate (4a):** Yield: 403mg, 64%. Yellow oil. Rf: 0.38 (33% EA/hexane). 1H NMR (400 MHz, CDCl3) δ7.38-7.34 (d, arom. 2H, J= 8.8 Hz), 6.84-6.80 (d, arom. 2H, J=8.8 Hz), 4.25-4.13 (m, 2H), 3.80 (s, CH3O, 3H), 3.78 (s, CH2O-, 2H), 3.49-3.45 (dd, 1H, J = 8.8;6.4 Hz), 3.15-3.11 (m, 1H), 2.81-2.75 (q, 1H, J= 8.8 Hz), 2.20-2.13(m, 1H), 2.03-1.81 (m, 3H), 1.27 (t, 3H, J=7.2 Hz); 13C NMR (100 MHz, CDCl3) δ173.7 (ester C=O), 159.4, 133.1, 115.2, 113.8, 85.1(C≡C), 82.7(C≡C), 62.9, 60.7, 55.2, 52.5, 42.2, 29.6, 23.3, 14.2. m/z (TOF-MS ES+) 288 (100, MH+), 246 (1), 156 (5); HRMS (TOF-MS ES+): MH+, found 288.1602. C17H22NO3 requires 288.1600.

**Ethyl 1-(3-(p-tolyl)prop-2-yn-1-yl)pyrrolidine-2-carboxylate (4b):** Yield: 360mg, 60%.Rf: 0.49 (33% EA/hexane). 1H NMR (400 MHz, CDCl3) δ 7.33-7.31 (d, arom. 2H, J= 8.4), 7.11-7.08 (d, arom. 2H, J=8.0 Hz), 4.26-4.14 (m, 2H), 3.80 (s, CH2O, 2H), 3.51-3.47 (dd, 1H, J = 8.8;6.4 Hz), 3.16-3.11 (m, 1H), 2.82-2.76 (q, 1H, J= 7.6 Hz), 2.34 (s, CH3-, 3H), 2.20-2.15 (m, 1H), 2.02-1.81 (m, 3H), 1.28 (t, 3H, J=7.2 Hz); 13C NMR (100 MHz, CDCl3) δ 173.7 (ester C=O), 138.1, 131.6, 129.0, 119.9, 85.4(C≡C), 83.4(C≡C), 62.9, 60.7, 52.5, 42.2, 29.6, 23.3, 21.4, 14.2.m/z (TOF-MS ES+) 272 (100, MH+), 246 (1); HRMS (TOF-MS ES+): MH+, found 272.1660. C17H22NO2 requires 272.1651.

**Isopropyl 1-(3-(4-methoxyphenyl)prop-2-yn-1-yl)pyrrolidine-2-carboxylate (4c):**Yield: 450mg, 60%. Brown oil. Rf: 0.47 (33% EA/hexane). 1H NMR (400 MHz, CDCl3) δ7.37-7.34 (d, arom. 2H, J= 8.8 Hz),6.84-6.80 (d, arom. 2H, J=8.8 Hz), 5.11-5.03 (sep, 1H, J= 6.0 Hz), 3.80-3.78 (d, CH3O, 3H, J= 5.6 Hz), 3.46-3.42 (dd, 1H, J = 8.8;6.0 Hz), 3.15-3.11 (m, 1H), 2.81-2.75 (q, 1H, J= 8.4 Hz), 2.20-2.10 (m, 1H), 1.99-1.79 (m, 3H), 1.26-1.24 (dd, 6H, J=10.0, 2.0 Hz); 13C NMR (100 MHz, CDCl3) δ 173.2 (ester C=O), 159.4, 133.1, 115.2, 113.8, 84.9(C≡C), 82.7(C≡C), 67.9, 62.9, 55.2, 52.4, 42.0, 29.5, 23.2, 21.8. m/z (TOF-MS ES+)302 (100, MH+), 300 (1), 295 (1); HRMS (TOF-MS ES+): MH+, found 302.1767. C18H24NO3 requires 302.1756.

**Isopropyl 1-(3-(p-tolyl)prop-2-yn-1-yl)pyrrolidine-2-carboxylate (4d) :** Yield: 585mg, 82%. Yellow oil. Rf: 0.58 (33% EA/hexane).1H NMR (400 MHz, CDCl3) δ 7.34-7.32 (d, arom. 2H, J= 8.0 Hz), 7.12-7.10 (d, arom. 2H, J=8.0 Hz), 5.13-5.03 (quint, 1H, J= 6.4 Hz), 3.81 (s, CH2, 2H), 3.48-3.44 (dd, 1H, J = 9.2;6.0 Hz), 3.16-3.12 (m, 1H),2.83-2.77 (q, 1H, J= 8.8 Hz), 2.35 (s, CH3-, 3H), 2.22-2.11 (m, 1H), 2.02-1.79 (m, 3H), 1.27-1.23 (dd, 6H, J=6.4, 4.0 Hz); 13C NMR (100 MHz, CDCl3) δ 173.2 (ester C=O), 138.1, 131.6, 129.0, 120.0, 85.3(C≡C), 83.5(C≡C), 67.9, 62.9, 52.5, 42.1, 29.6, 23.2, 21.4. m/z (TOF-MS ES+) 286 (100, MH+), 284 (10), 279 (1); HRMS (TOF-MS ES+): MH+, found 286.1812. C18H24NO2 requires 286.1807.

**Isopropyl 1-(3-(4-ethoxyphenyl)prop-2-yn-1-yl)pyrrolidine-2-carboxylate (4e):** Yield: 578mg, 73%.Dark red oil. Rf: 0.53 (33% EA/hexane).1H NMR (400 MHz, CDCl3) δ 7.33-7.31 (d, arom. 2H, J= 9.2 Hz), 6.80-6.77 (d, arom. 2H, J=9.2 Hz), 5.09-4.99 (quint, 1H, J=6.4 Hz), 4.01-3.96 (q, 2H, J=7.2 Hz), 3.76 (s, CH2O, 2H), 3.44-3.39 (dd, 1H, J = 9.2;6.4 Hz), 3.12-3.08 (m, 1H),2.78-2.70 (q, 1H, J= 8.8. Hz), 2.18-2.08 (m, 1H), 1.95-1.74 (m, 3H), 1.38 (t, 3H, J=7.6 Hz), 1.23-1.21 (dd, 6H, J=6.4, 2.4 Hz); 13C NMR (100 MHz, CDCl3) δ 173.3 (ester C=O), 158.9, 133.2, 115.2, 114.5, 85.3, 82.7, 68.1, 63.6, 63.0, 52.6, 42.2, 29.7, 23.4, 21.9, 14.8. m/z (TOF-MS ES+) 316 (100, MH+), 309 (1), 298 (1); HRMS (TOF-MS ES+): MH+, found 316.1913. C19H26NO3 requires 316.1915.

**Propyl 1-(3-(4-methoxyphenyl)prop-2-yn-1-yl)pyrrolidine-2-carboxylate (4f):** Yield: 666 mg, 73%. Yellow-green oil. Rf: 0.55 (33% EA/hexane). 1H NMR (400 MHz, CDCl3) δ 7.34-7.32 (d, arom. 2H, J= 7.3 Hz), 6.80-6.78 (d, arom. 2H, J=8.9 Hz), 4.15-4.00 (m, 2H), 3.76 (s, CH2O, 2H), 3.76 (s, CH3O, 3H), 3.49-3.42 (dd, 1H, J = 8.6, 7.1 Hz), 3.10 (t, 1H, J = 6.8 Hz),2.78-2.72 (q, 1H, J= 7.8 Hz), 2.01-1.87 (m, 2H), 1.83-1.76 (m, 1H), 1.68-1.59 (m, 2H), 0.90 (t, 3H, J=7.4 Hz); 13C NMR (100 MHz, CDCl3) δ 173.9 (ester C=O), 159.5, 133.4, 115.2, 113.9, 85.3(C≡C), 82.7(C≡C), 66.3, 62.8, 55.4, 52.5, 42.3, 29.7, 23.2, 22.0, 10.4. m/z (TOF-MS ES+) 302 (100, MH+), 303 (15); HRMS (TOF-MS ES+): MH+, found 302.1759. C18H24NO3 requires 302.1756.

**Propyl 1-(3-(p-tolyl)prop-2-yn-1-yl)pyrrolidine-2-carboxylate (4g):** Yield: 752mg, 73%. Brown oil. Rf: 0.58 (33% EA/hexane). 1H NMR (400 MHz, CDCl3) δ7.31-7.28 (d, arom. 2H, J= 8.0 Hz), 7.09-7.07 (d, arom. 2H, J=8.0 Hz), 4.13-4.02 (m, 2H), 3.78 (s, CH2O, 2H), 3.49-3.46 (dd, 1H, J = 9.1;6.7 Hz), 3.13-3.09 (m, 1H), 2.80-2.74 (dd, 1H, J= 16.6, 8.9 Hz), 2.31 (s, 2H), 2.20-2.11 (m, 1H), 2.01-1.88 (m, 2H), 1.84-1.78 (m, 1H), 1.69-1.60 (m, 2H), 0.91 (t, 3H, J=7.4 Hz); 13C NMR (100 MHz, CDCl3) δ 173.9 (ester C=O), 138.2, 131.7, 129.1, 120.0, 85.4(C≡C), 83.4(C≡C), 66.4, 62.9, 52.4, 42.2, 29.7, 23.3, 21.9, 21.5, 10.5. m/z (TOF-MS ES+) 286 (100, MH+), 287(20), 288 (1); HRMS (TOF-MS ES+): MH+, found 286.1809. C18H24NO2 requires 286.1807.

**Butyl 1-(3-(4-methoxyphenyl)prop-2-yn-1-yl)pyrrolidine-2-carboxylate (4h):** Yield: 394mg, 80%. Dark-brown oil. Rf: 0.58 (33% EA/hexane). 1H NMR (400 MHz, CDCl3) δ7.36-7.34 (d, arom. 2H, J= 8.9 Hz), 6.82-6.80 (d, arom. 2H, J=8.9 Hz),4.18-4.07 (m, 2H), 3.79 (s,3H), 3.78 (d, CH2O, 2H, J = 1.1 Hz), 3.49-3.45 (dd, 1H, J = 9.1, 6.6 Hz), 3.14-3.09 (m, 1H), 2.80-2.74 (m, 1H), 2.21-2.11 (m, 1H), 2.03-1.78 (m, 3H), 1.66-1.58 (m, 2H), 1.41-1.32 (dq, 2H, 14.7, 7.4 Hz), 0.92 (t, 3H, J=7.4 Hz); 13C NMR (100 MHz, CDCl3) δ173.8 (ester C=O), 159.5, 138.2, 133.2, 114.2, 84.9(C≡C), 82.6(C≡C), 64.4, 62.8, 55.5, 52.3, 42.1, 30.9, 29.7, 23.0, 19.1, 14.0. m/z (TOF-MS ES+) 316 (100, MH+), 143(5); HRMS (TOF-MS ES+): MH+, found 316.1906. C19H26NO3 requires 316.1915.

**Butyl 1-(3-(p-tolyl)prop-2-yn-1-yl)pyrrolidine-2-carboxylate (4i):** Yield: 130mg, 65%. Dark-brown oil. Rf: 0.63 (33% EA/hexane). 1H NMR (400 MHz, CDCl3) δ7.32-7.30 (d, arom. 2H, J= 8.1 Hz), 7.10-7.08 (d, arom. 2H, J=8.0 Hz), 4.18-4.08 (m, 2H), 3.79 (d, CH2O, 2H, J=1.3 Hz), 3.50-3.46 (dd, 1H, J = 9.1, 6.6 Hz), 3.14-3.09 (m, 1H), 2.81-2.75 (dd, 1H, J= 16.5, 8.9 Hz), 2.33 (s,3H), 2.21-2.12 (m, 1H),2.04-1.76 (m, 3H), 1.66-1.59 (m, 2H), 1.41-1.32 (m, 2H), 0.93 (t, J=7.4 Hz); 13C NMR (100 MHz, CDCl3) δ173.9 (ester C=O),138.2,131.6, 128.9, 119.9, 85.3(C≡C), 83.4(C≡C), 64.6, 63.0, 52.3, 42.3, 30.6, 29.7, 23.5, 21.3, 19.1, 13.7. m/z (TOF-MS ES+) 300 (100, MH+), 301 (20), 302 (5); HRMS (TOF-MS ES+): MH+, found 300.1964. C19H26NO2 requires 300.1959.

**Following Method B;**

**Ethyl 1-(3-phenylprop-2-yn-1-yl)pyrrolidine-2-carboxylate (4j):** Yield: 540mg, 70%. Yellow oil. Rf: 0.49 (33% EA/hexane).IR (KBr): νmax/cm-1 = 3055 (arom. C-H), 2978-2816 (alip. CH), 2229 (C≡C), 1739 (ester C=O), 1597 (arom C=C), 1489, 1442, 1180 (C-O) cm-1; 1H NMR (400 MHz, CDCl3) δ 7.42-7.38 (m, arom. 2H), 7.29-7.24 (m, arom. 3H), 4.25-4.12 (m, 2H),3.79 (s, CH2O, 2H), 3.48-3.44 (dd, 1H, J = 9.2;6.4 Hz), 3.14-3.10 (m, 1H), 2.80-2.74 (q, 1H, J= 8.8. Hz), 2.21-2.10 (m, 1H), 2.02-1.76 (m, 3H), 1.25 (t, 3H, J=7.2 Hz); 13C NMR (100 MHz, CDCl3) δ 173.3 (ester C=O), 131.5, 127.8, 122.7, 113.8, 85.4(C≡C), 84.3(C≡C), 63.0, 60.8, 52.6, 42.3, 29.7, 23.4, 14.5. m/z (TOF-MS ES+) 258 (100, MH+), 256 (1), 246 (1); HRMS (TOF-MS ES+): MH+, found 258.1496. C16H20NO2 requires 258.1494.

**Propyl 1-(3-phenylprop-2-yn-1-yl)pyrrolidine-2-carboxylate (4k):**Yield: 461 mg, 85%. Pale yellow oil. Rf: 0.64 (33% EA/hexane).7.43-7.39 (m, arom. 2H), 7.30-7.26 (m, arom. 3H), 4.15-4.03 (m, 2H), 3.80 (d, CH2O, 2H, J=1.7 Hz), 3.55-3.47 (dd, 1H, J = 9.1, 6.6 Hz), 3.15-3.09 (m, 1H), 2.82-2.75 (td, 1H, J= 8.9, 7.6 Hz), 2.22-2.09 (m, 1H), 2.05-1.76 (m, 3H), 1.71-1.61 (m, 2H), 0.93 (t, 3H, J=7.4 Hz); 13C NMR (100 MHz, CDCl3) δ 173.7 (ester C=O), 131.9, 128.4, 122.8, 85.5(C≡C), 84.1(C≡C), 66.2, 62.9, 60.8, 52.5, 42.2, 29.6, 23.3, 21.9, 10.3. m/z (TOF-MS ES+) 272 (100, MH+), 302 (30), 310(10); HRMS (TOF-MS ES+): MH+, found 272.1645. C17H22NO2 requires 272.1651.

**Isopropyl 1-(3-phenylprop-2-yn-1-yl)pyrrolidine-2-carboxylate (4l):** Yield:1310 mg, 81%. Pale yellow oil. Rf: 0.60 (33% EA/hexane).1H NMR (400 MHz, CDCl3) δ 7.42-7.39 (m, arom. 2H), 7.29-7.25 (m, arom. 3H), 5.10-5.00 (quint, 1H, J=6.0 Hz), 3.79 (s, CH2O-, 2H), 3.44-3.40 (dd, 1H, J = 8.8;6.4 Hz), 3.14-3.09 (m, 1H), 2.80-2.73 (q, 1H, J= 8.8. Hz), 2.19-2.09 (m, 1H), 2.02-1.75 (m, 3H), 1.24-1.22 (dd, 6H, J=6.4, 2.0 Hz); 13C NMR (100 MHz, CDCl3) δ 173.0 (ester C=O), 131.8, 128.3, 128.1, 123.2, 113.8, 85.3(C≡C), 84.4(C≡C), 68.1, 63.1, 52.6, 42.2, 29.7, 23.4, 21.9. m/z (TOF-MS ES+) 272 (100, MH+), 246 (1); HRMS (TOF-MS ES+): MH+, found 272.1649. C17H22NO2 requires 272.1651.

**Butyl 1-(3-phenylprop-2-yn-1-yl)pyrrolidine-2-carboxylate (4m):** Yield: 1200 mg, 84%. Pale yellow oil. Rf: 0.66 (33% EA/hexane).1H NMR (400 MHz, CDCl3) δ7.43-7.40 (m, arom. 2H), 7.30-7.27 (m, arom. 3H), 4.18-4.08 (m, 2H), 3.80 (d, CH2O, 2H, J=1.8 Hz), 3.50-3.46 (dd, 1H, J = 9.1, 6.6 Hz), 3.15-3.10 (m, 1H), 2.80-2.76 (dt, 1H, J= 8.9, 4.4 Hz), 2.22-2.11 (m, 1H), 2.05-1.86 (m, 2H), 1.86-1.77 (m, 1H), 1.66-1.58 (m, 2H), 1.41-1.32 (dq, 2H, J=14.6, 7.4 Hz), 0.91 (t, 3H, J=7.4 Hz); 13C NMR (100 MHz, CDCl3) δ 173.6 (ester C=O), 131.9, 128.0, 123.0, 85.4(C≡C), 84.0(C≡C), 64.4, 62.8, 52.6, 42.1, 30.6, 29.4, 23.0, 18.8, 13.9. m/z (TOF-MS ES+) 286 (100, MH+), 287 (20), 288 (5); HRMS (TOF-MS ES+): MH+, found 286.1797. C18H24NO2 requires 286.1807.

**sec-butyl 1-(3-phenylprop-2-yn-1-yl)pyrrolidine-2-carboxylate (4n):** Yield:1230 mg, 86%. Pale yellow oil. Rf: 0.69 (33% EA/hexane).1H NMR (400 MHz, CDCl3) δ 7.42-7.39(m, arom. 2H), 7.29-7.26 (m, arom. 3H), 4.90 (hep, 1H, J=6.3 Hz), 3.79 (d, CH2O, 2H, J=3.8 Hz), 3.47-3.43 (dd, 1H, J = 9.0, 6.6 Hz), 3.14-3.10 (m, 1H), 2.81-2.74 (dd, 1H, J= 16.5, 8.7 Hz), 2.21-2.09 (m, 1H), 2.02-1.85 (m, 2H), 1.84-1.75 (m, 1H), 1.66-1.48 (m, 2H), 1.21-1.19(dd, 3H, J=6.3, 2.7 Hz), 0.88 (t, 3H, J=7.5 Hz); 13C NMR (100 MHz, CDCl3) δ 173.3 (ester C=O), 131.7, 128.2, 122.9, 85.2(C≡C), 84.3(C≡C), 72.2, 62.9, 52.4, 42.1, 29.6, 28.7, 23.1, 19.3, 9.7. m/z (TOF-MS ES+) 286 (100, MH+), 288 (55), 289 (10); HRMS (TOF-MS ES+): MH+, found 286.1800. C18H24NO2 requires 286.1807.

**Ethyl 1-(hept-2-yn-1-yl)pyrrolidine-2-carboxylate (4o):** Yield: 619 mg, 87%. Colorless oil. Rf: 0.49 (33% EA/hexane). IR (KBr): νmax/cm-1 = 2958-2820 (alip. CH), 2256 (C≡C), 1743 (ester C=O), 1458, 1442, 1180 (C-O) cm-1;1H NMR (400 MHz, CDCl3) δ 4.20-4.13 (m, 2H), 3.52-3.51 (m, 2H), 3.38-3.34 (dd, 1H, J = 9.2;6.8 Hz), 3.04-3.00 (m, 1H), 2.69-2.62 (q, 1H, J= 9.2 Hz), 2.18-2.05(m, 3H), 1.98-1.71 (m, 3H), 1.48-1.33 (m, 4H), 1.25 (t, 3H, J=7.6 Hz), 0.87 (t, 3H, J=7.6 Hz); 13C NMR (100 MHz, CDCl3) δ 173.9 (ester C=O), 85.6 (C≡C), 74.3(C≡C), 62.8, 60.7, 52.4, 41.7, 31.1, 29.7, 23.3, 22.0, 18.4, 14.2, 13.7.m/z (TOF-MS ES+) 238 (100, MH+), 224 (1); HRMS (TOF-MS ES+): MH+, found 288.1811. C14H24NO2 requires 238.1807.

**Isopropyl 1-(hept-2-yn-1-yl)pyrrolidine-2-carboxylate (4p):** Yield: 954mg, 76%. Pale yellow oil. Rf: 0.46 (33% EA/hexane).1H NMR (400 MHz, CDCl3) δ5.04-4.95 (m, 1H), 3.49 (t,2H, J=2.2 Hz), 3.31-3.27 (dd, 1H, J=9.0, 6.5 Hz), 3.01-2.96 (td, 1H, J=7.9,2.9Hz), 2.66-2.59 (dd, 1H, J=17.1,8.3Hz), 2.14-2.04 (m, 3H), 1.92-1.80 (m, 2H), 1.78-1.70 (m, 1H), 1.43-1.31 (m,4H), 1.20-1.18 (m, 6H), 0.85 (t, 3H, J=7.2 Hz);13C NMR (100 MHz, CDCl3) δ 173.4 (ester C=O), 85.4 (C≡C), 74.3(C≡C), 67.9, 62.9, 52.3, 41.4, 31.1, 29.6, 23.3, 22.0, 21.8, 18.2, 13.5.m/z (TOF-MS ES+) 252 (100, MH+), 253 (20); HRMS (TOF-MS ES+): MH+, found 252.1965. C15H26NO2 requires 252.1963.

**Butyl 1-(hept-2-yn-1-yl)pyrrolidine-2-carboxylate (4r):** Yield: 721 mg, 75%. Pale yellow oil. Rf: 0.40 (33% EA/hexane). 1H NMR (400 MHz, CDCl3) δ4.15-4.05 (m, 2H), 3.52 (t,2H, J=2.2 Hz), 3.39-3.35 (dd, 1H, J=9.0, 6.7 Hz), 3.04-3.00 (m, 1H), 2.69-2.63 (m, 1H), 2.18-2.08 (m, 3H), 1.96-1.83 (m, 2H), 1.80-1.74 (m, 1H), 1.63-1.56 (m,2H), 1.48-1.30 (m, 6H), 0.93-0.85 (m, 6H);13C NMR (100 MHz, CDCl3) δ174.1 (ester C=O), 85.5 (C≡C), 74.2(C≡C), 64.6, 62.7, 52.4, 41.6, 30.9, 30.7, 29.6, 23.3, 22.0, 19.2, 18.5, 13.8, 13.7.m/z (TOF-MS ES+) 266 (100, MH+), 267 (20); HRMS (TOF-MS ES+): MH+, found 266.2131. C16H28NO2 requires 266.2120.

**Isopropyl 1-(4-methoxy-4-oxobut-2-yn-1-yl)pyrrolidine-2-carboxylate (4s):** Yield: 280 mg, 55%. Yellow oil. Rf: 0.42 (33% EA/hexane).1H NMR (400 MHz, CDCl3) δ 5.07-5.00 (m, 1H), 3.77-3.74 (m, MeO-, 3H), 3.36-3.32 (m, 1H), 3.07-3.03 (m, 1H), 2.74-2.67 (q, 1H, J= 8.0 Hz), 2.19-2.08 (m, 1H), 1.98-1.77 (m, 3H), 1.27 (td, 6H, J=6.4, 2.8 Hz).

**4-methylpentyl 1-(1-(phenylethynyl)cyclohexyl)pyrrolidine-2-carboxylate (4t):** Yield: 200 mg, 27%. Colorless oil. Rf: 0.88 (33% EA/hexane).1H NMR (400 MHz, CDCl3) δ7.43-7.41(dd, 2H, J=7.0, 2.8 Hz), 7.29-7.25 (dd, 3H, J=5.1, 2.1 Hz), 4.97-4.88 (m, 1H), 3.79-3.75 (ddd, CH-O-, 1H, J= 9.9, 6.0, 2.8 Hz), 3.25-3.17 (m, 1H), 3.07-3.03 (m, 1H), 2.88-2.78 (m, 1H), 2.10-1.74 (m, 6H), 1.72-1.27 (m, 12H), 1.19-1.17 (d, 4H, J=6.3 Hz), 0.91-0.87 (td, 3H, J=7.2, 1.7 Hz).

**Example Spectra for Precursors (3, 4):**

**1H-NMR Spectrum of 3a**

**
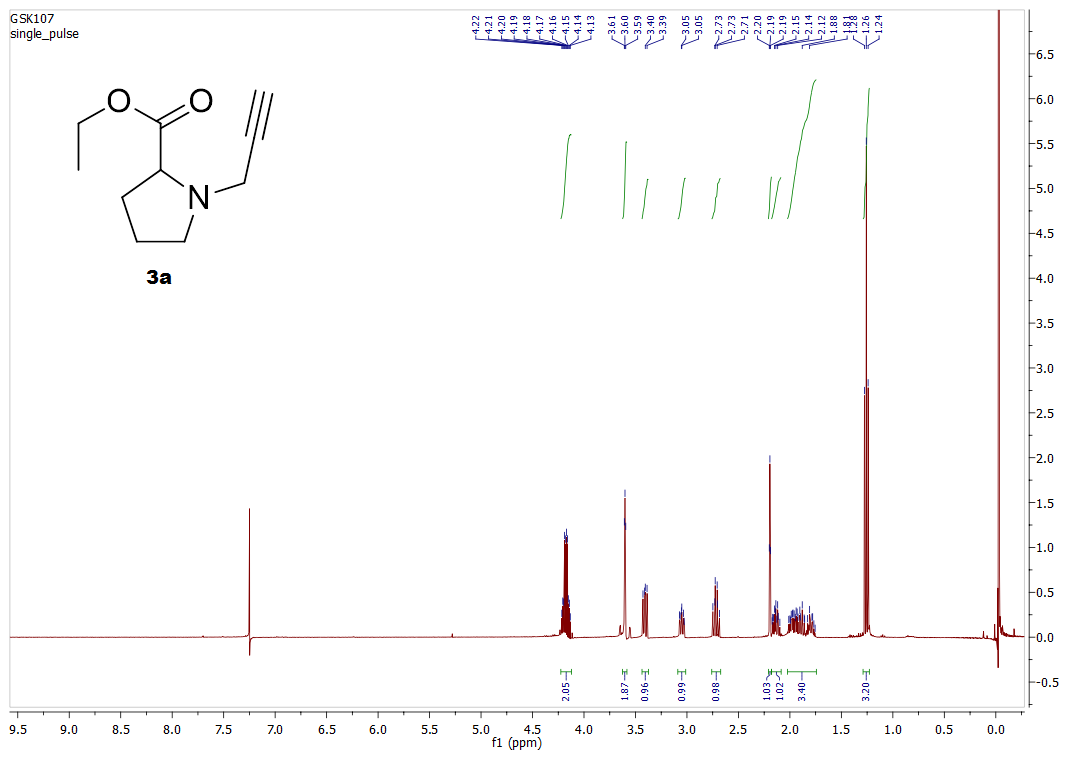
**

**13C-NMR Spectrum of 3a**

**
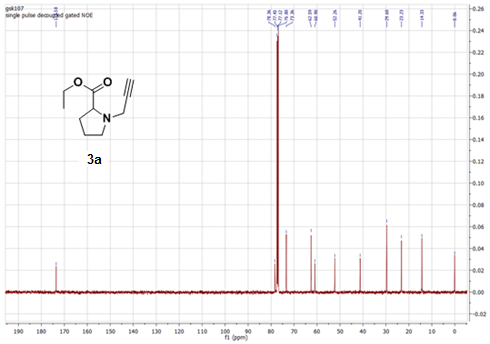
**

**HRMS Spectrum for 3a**

**
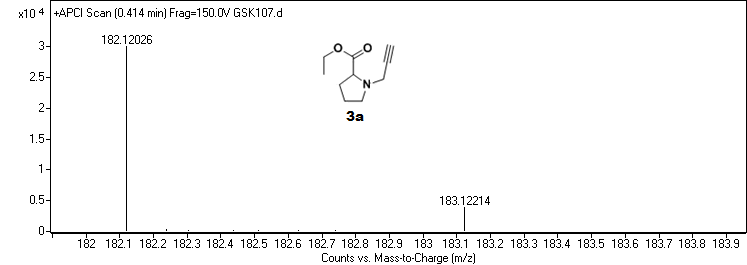
**

**1H-NMR Spectrum of 4a**

**
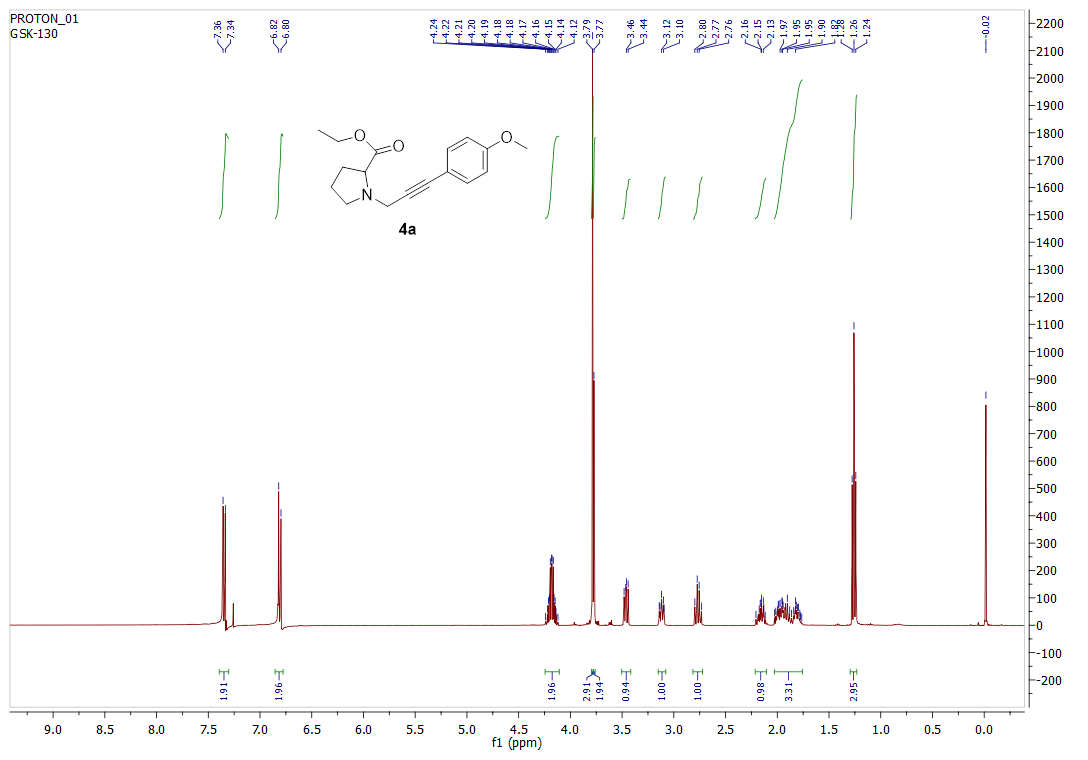
**

**13C-NMR Spectrum of 4a**

**
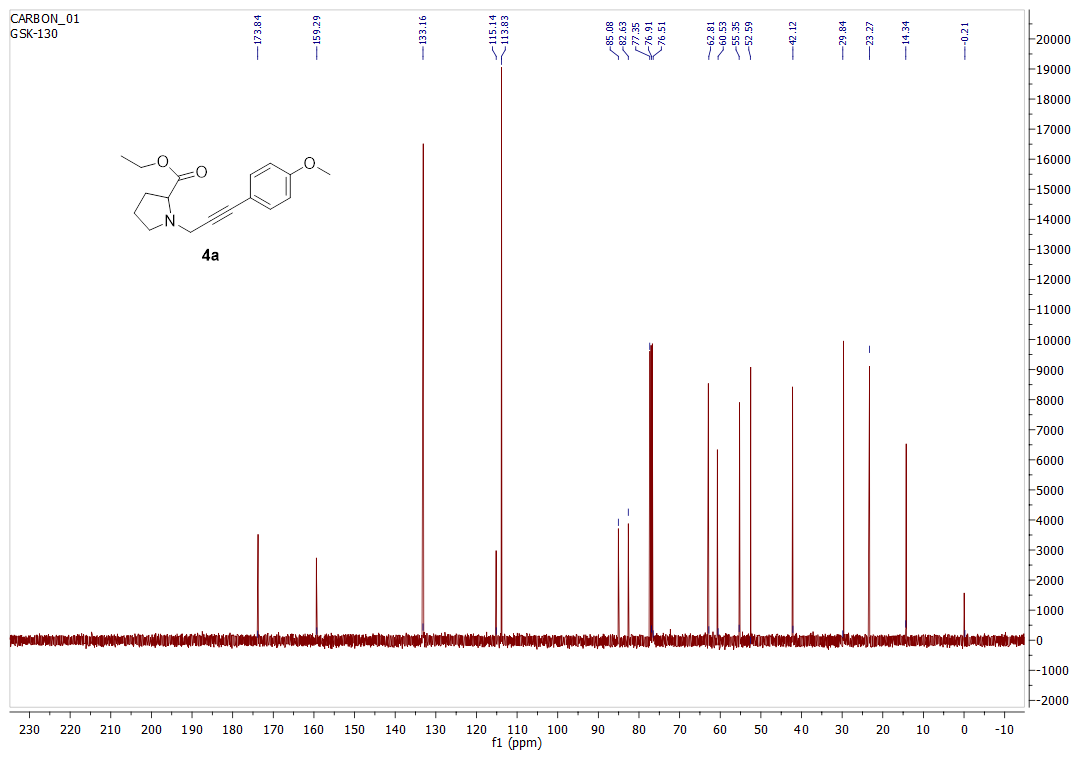
**

**HRMS Spectrum for 4a**

**
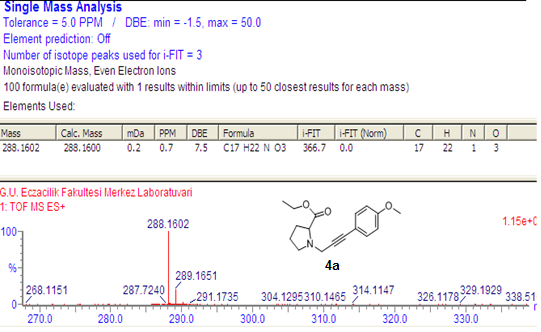
**

**1H-NMR Spectrum of 4p**

**
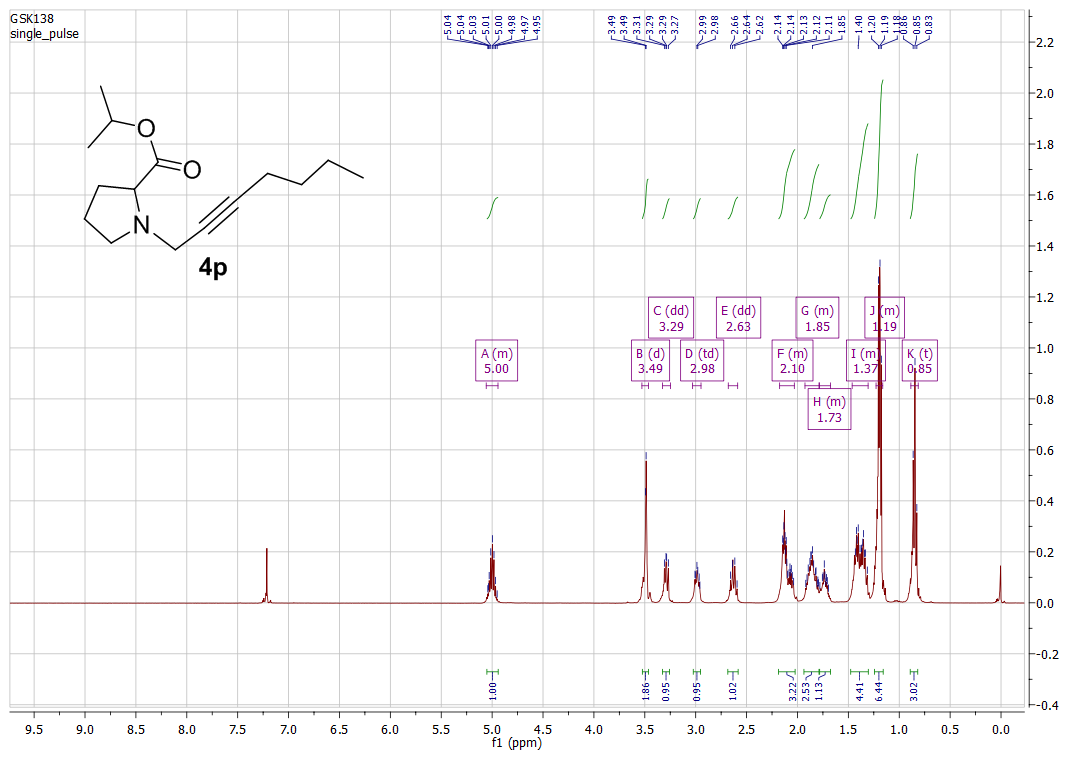
**

**13C-NMR Spectrum of 4p**

**
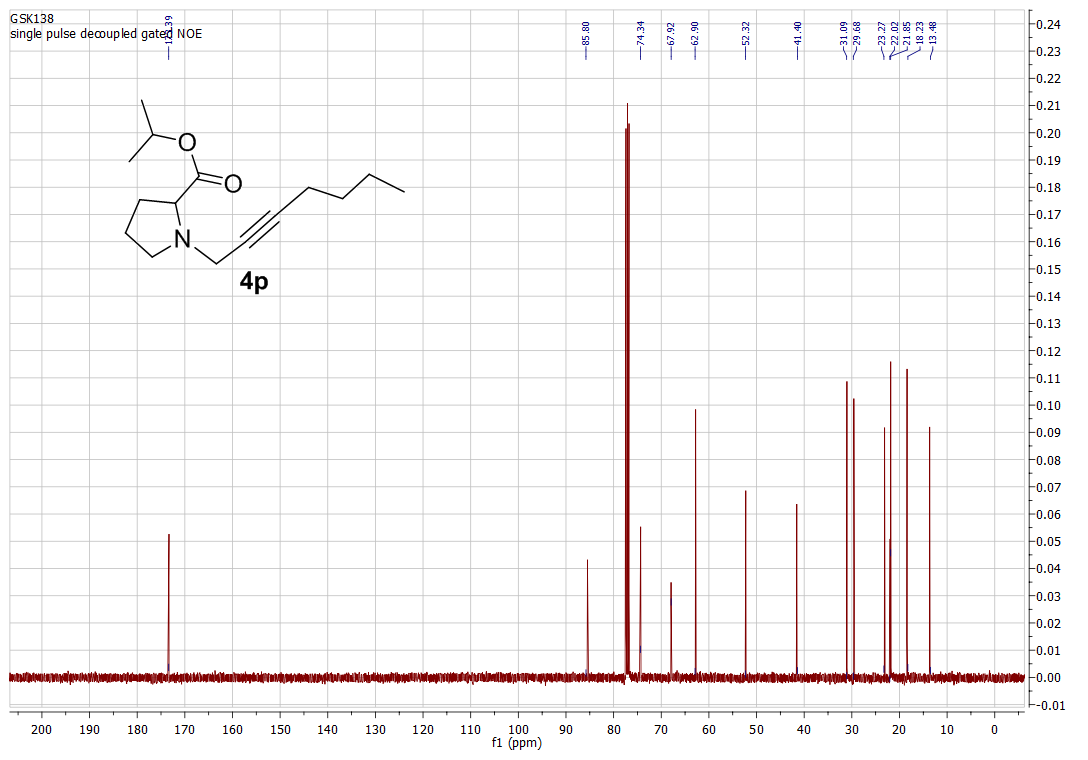
**

**Spectra for Products (5a-f, 6a-r and 6a’-r’):**

**1H-NMR Spectrum of 5a**

**
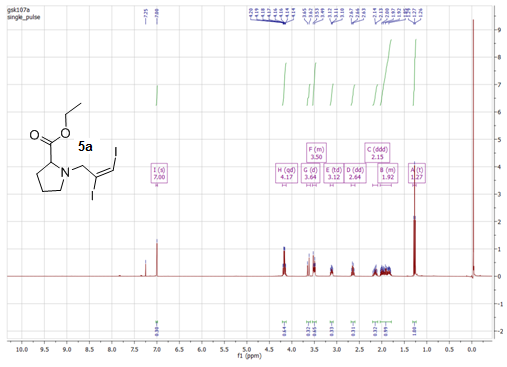
**

**13C-NMR Spectrum of 5a**

**
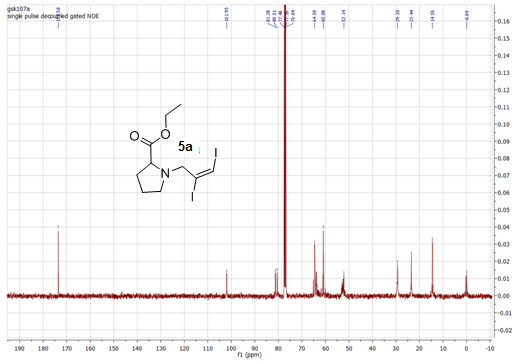
**

**HRMS Spectrum for 5a**

**
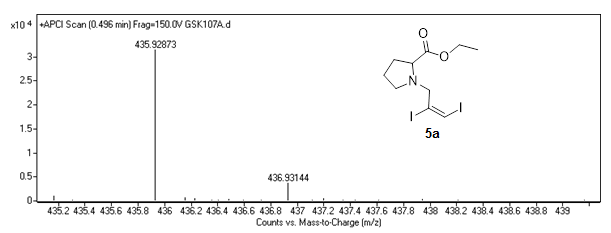
**

**1H-NMR Spectrum of 5b**

**
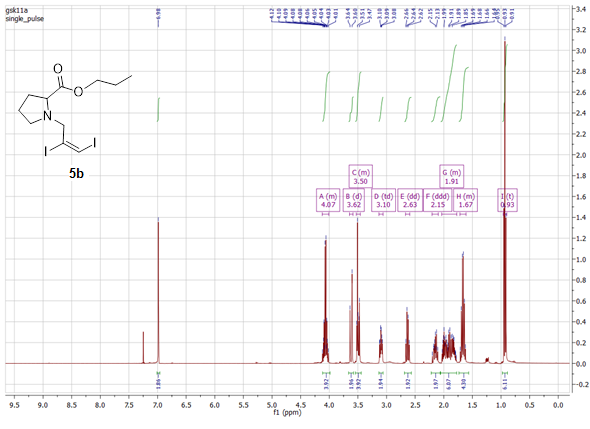
**

**13C-NMR Spectrum of 5b**

**
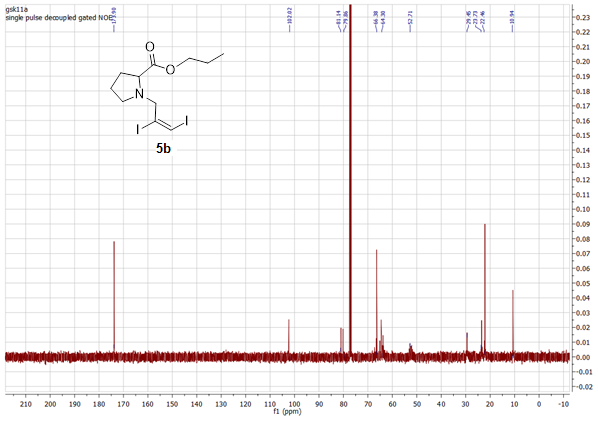
**

**1H-NMR Spectrum of 5c**

**
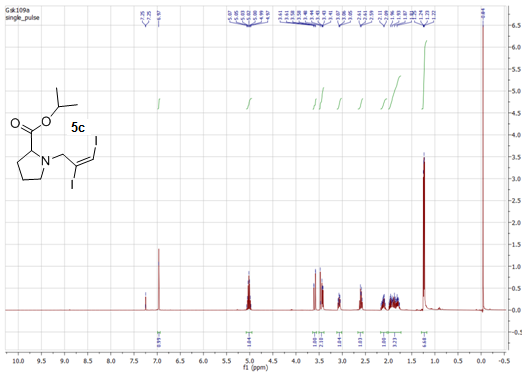
**

**13C-NMR Spectrum of 5c**

**
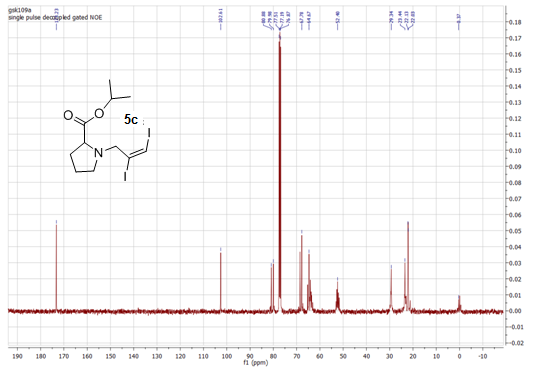
**

**1H-NMR Spectrum of 5d**

**
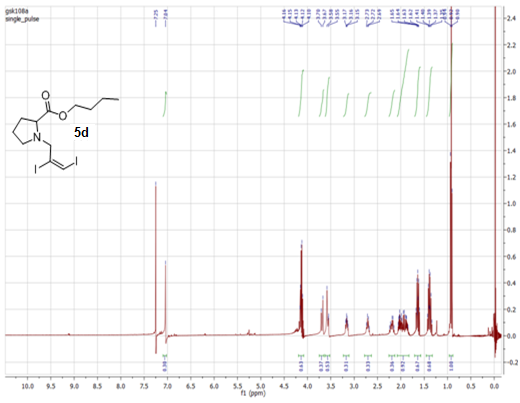
**

**13C-NMR Spectrum of 5d**

**
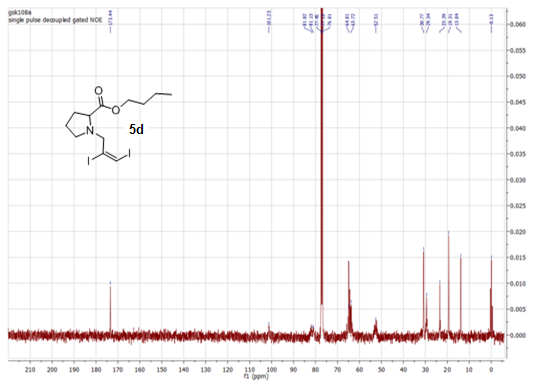
**

**1H-NMR Spectrum of 5e**

**
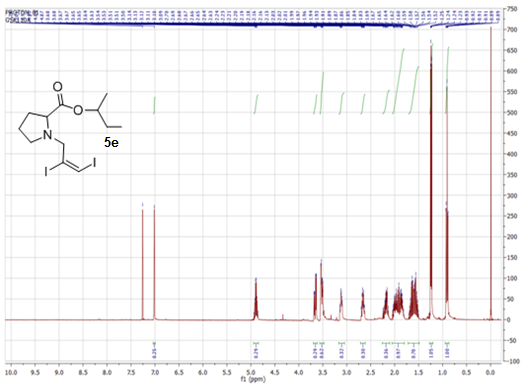
**

**13C-NMR Spectrum of 5e**

**
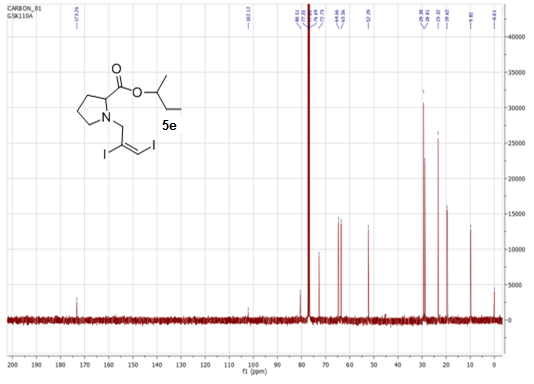
**

**1H-NMR Spectrum of 5f**

**
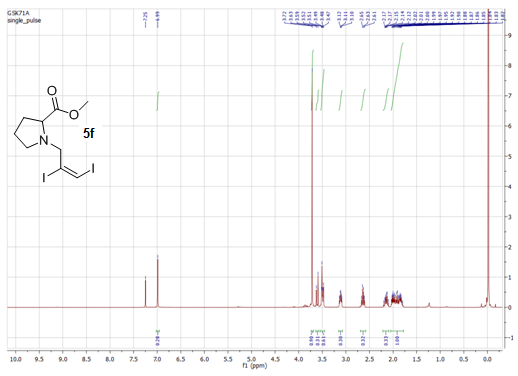
**

**13C-NMR Spectrum of 5f**

**
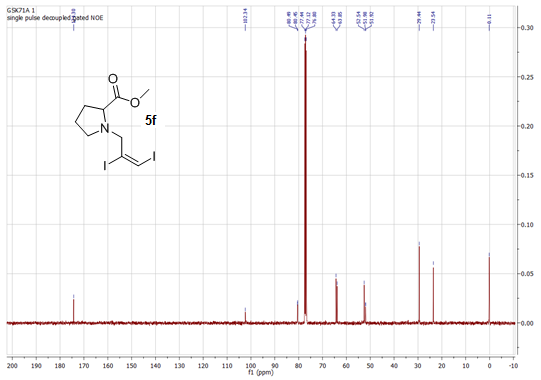
**

**1H-NMR Spectrum of 6a,6a’ isomer mixture**

**
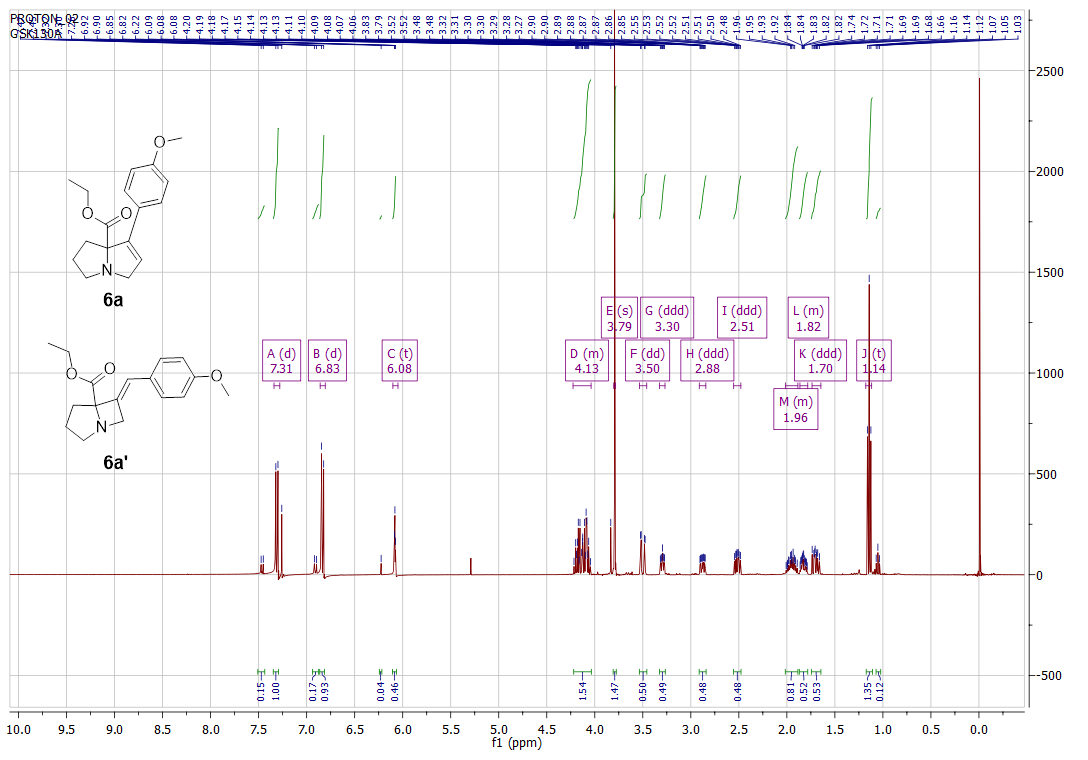
**

**13C-NMR Spectrum of 6a,6a’ isomer mixture**

**
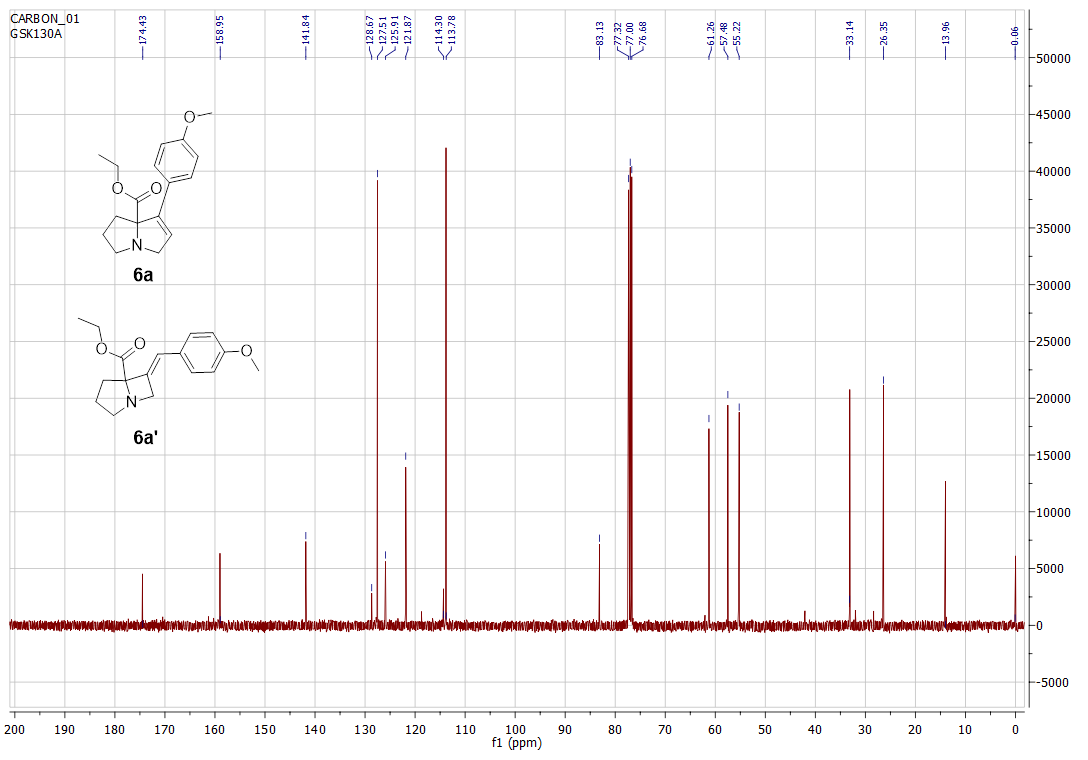
**

**HRMS Spectrum for 6a,6a’ isomer mixture**

**
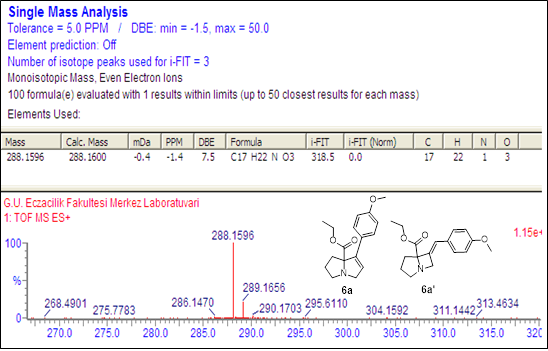
**

**1H-NMR Spectrum of 6b,6b’ isomer mixture**

**
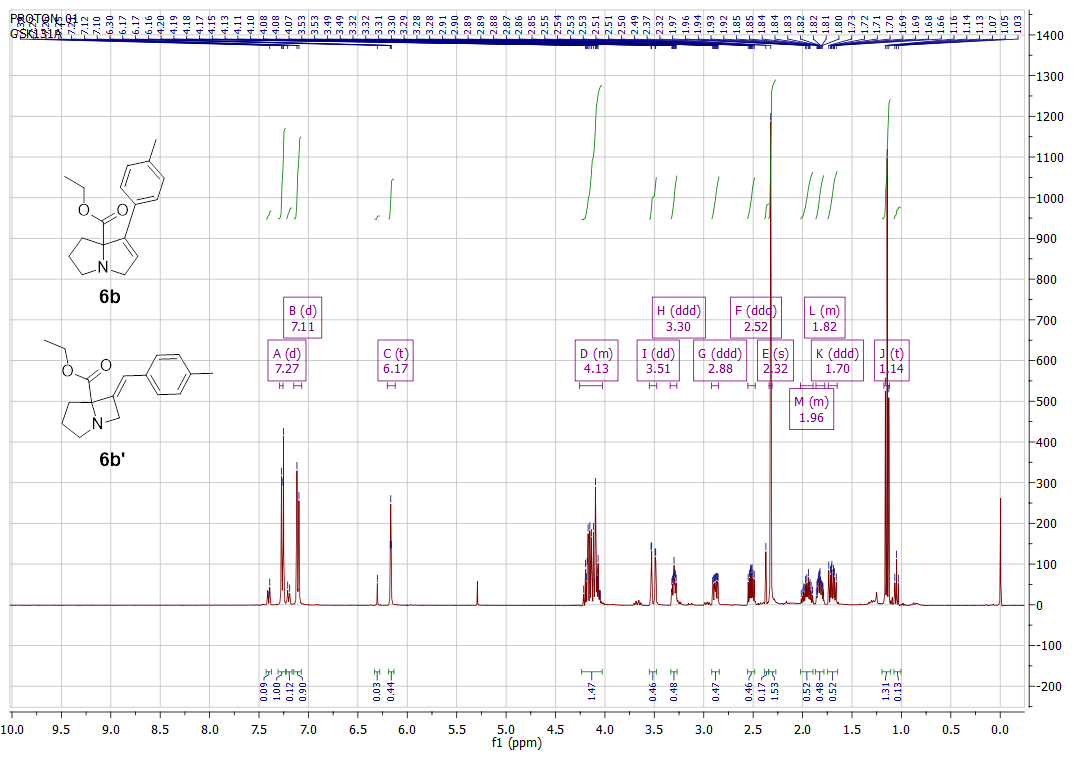
**

**13C-NMR Spectrum of 6b,6b’ isomer mixture**

**
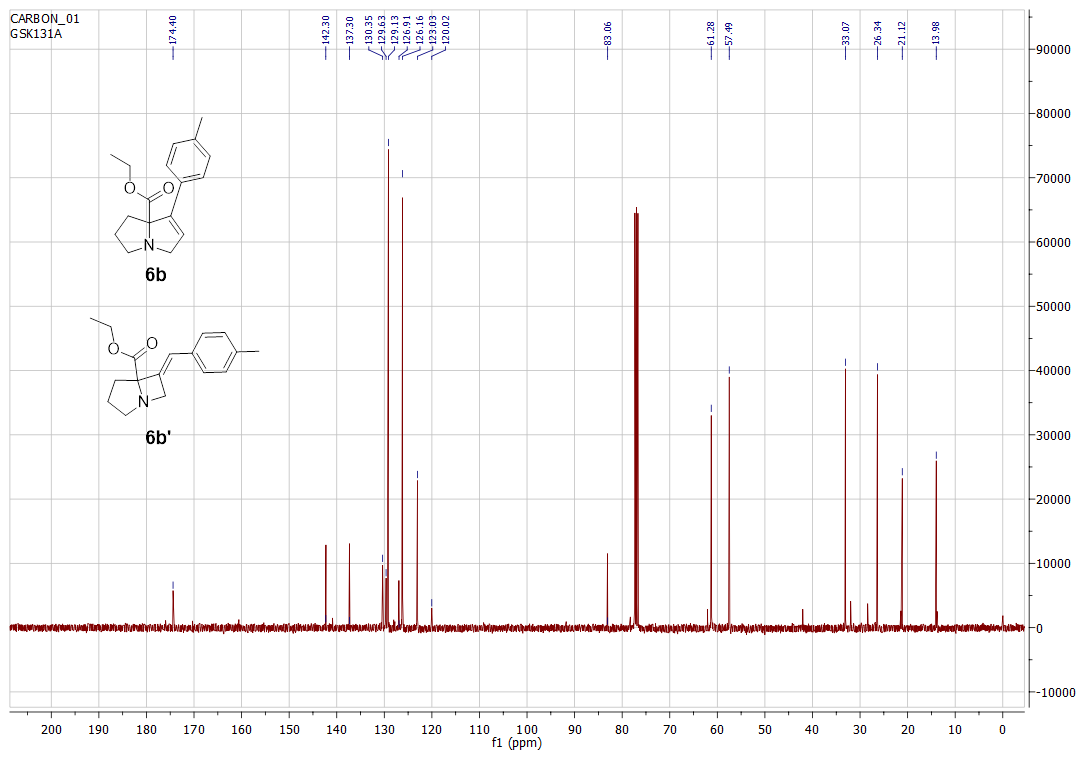
**

**1H-NMR Spectrum of 6c,6c’ isomer mixture**

**
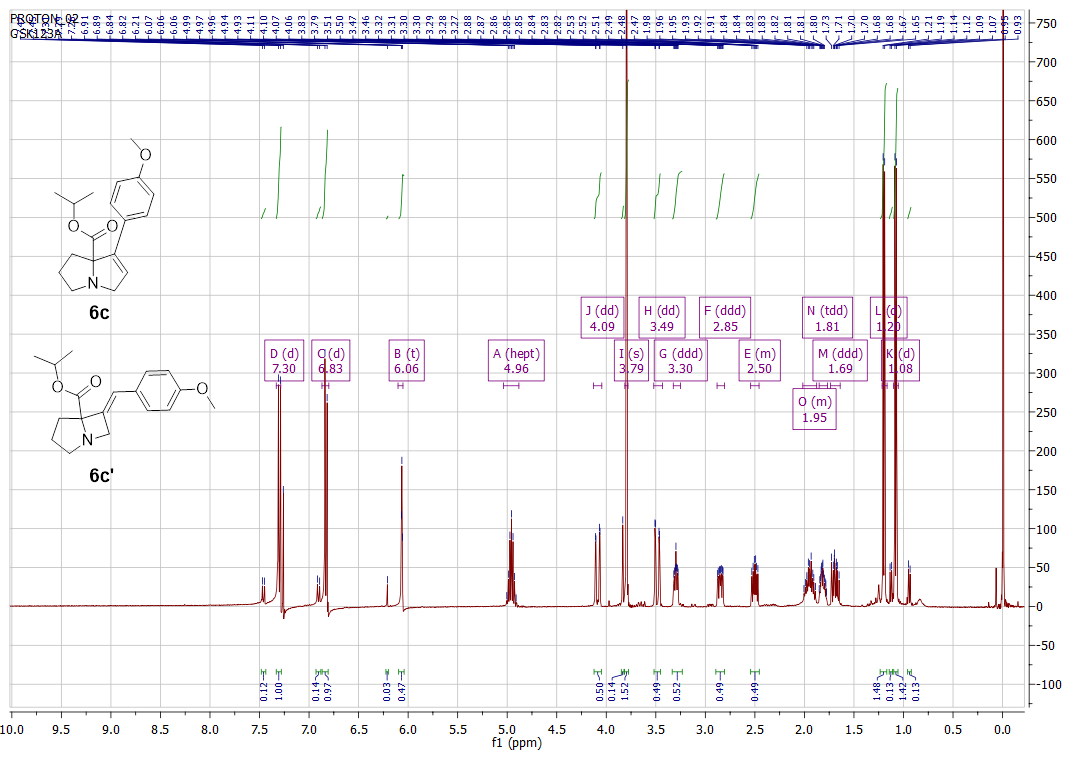
**

**13C-NMR Spectrum of 6c,6c’ isomer mixture**


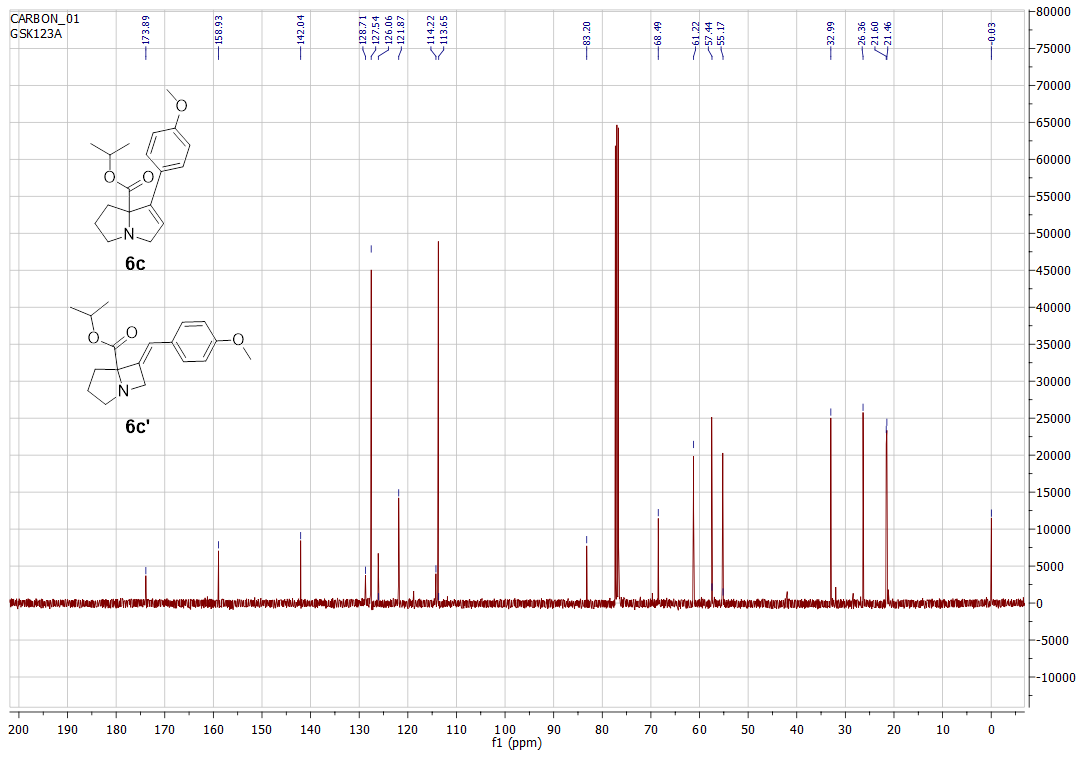


**1H-NMR Spectrum of 6d,6d’ isomer mixture**

**
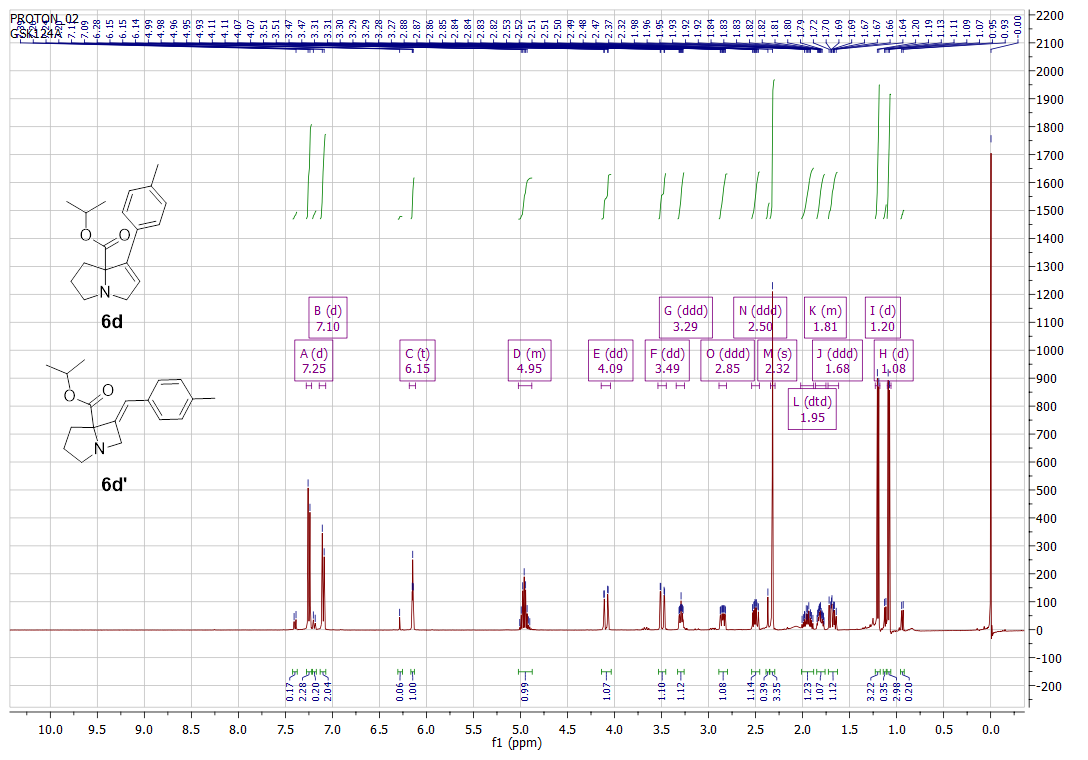
**

**13C-NMR Spectrum of 6d,6d’ isomer mixture**


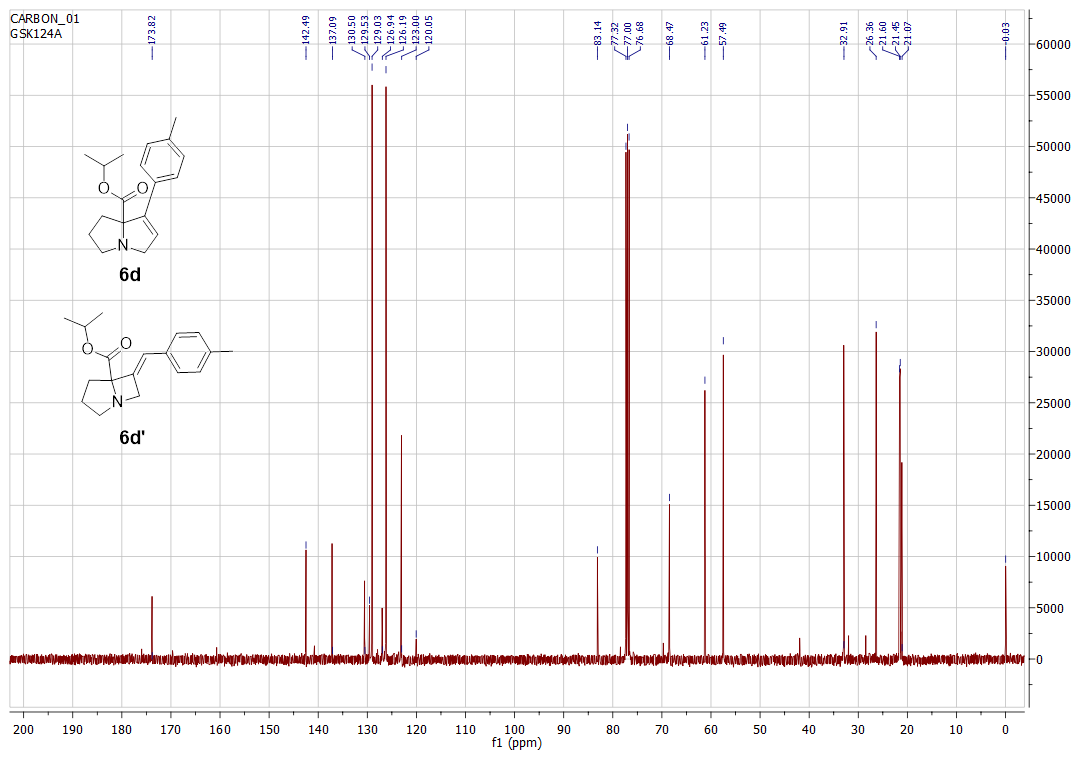


**1H-NMR Spectrum of 6e,6e’ isomer mixture**

**
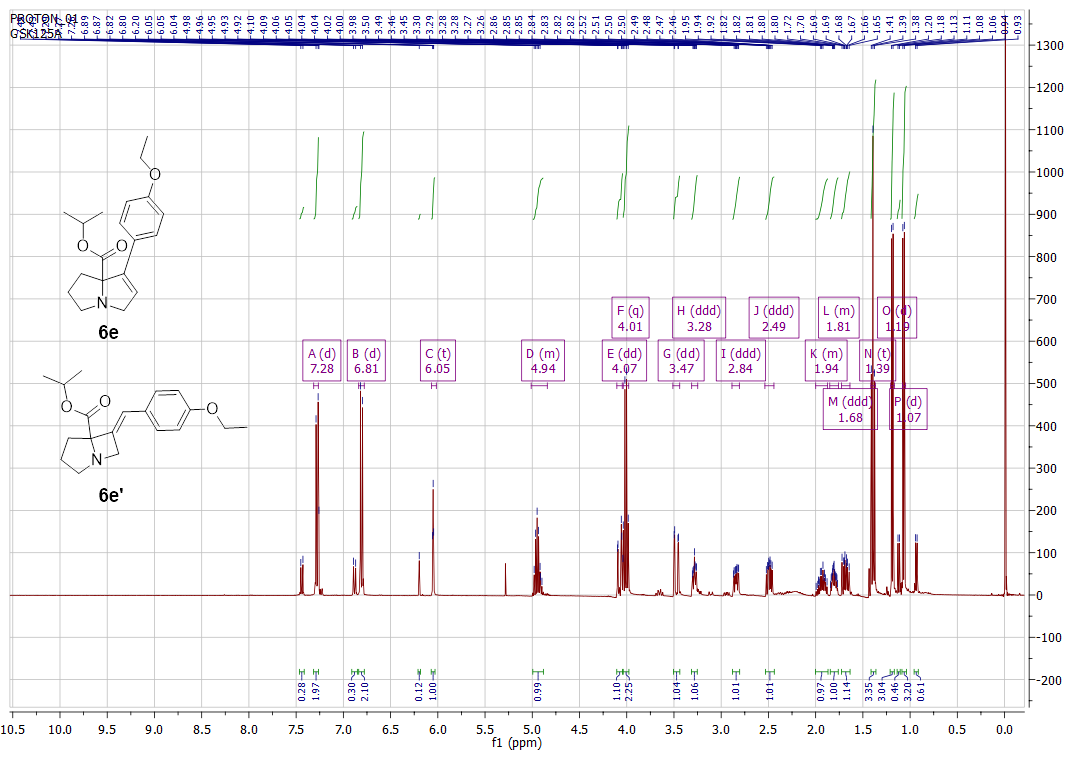
**

**13C-NMR Spectrum of 6e,6e’ isomer mixture**

**
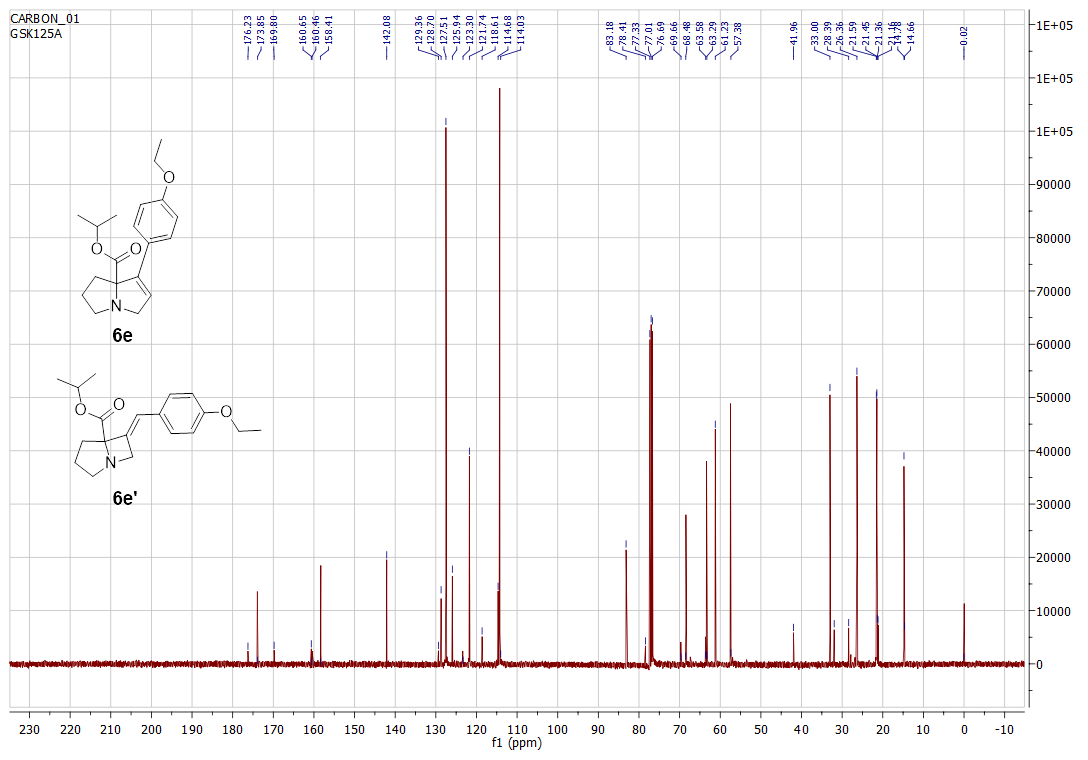
**

**1H-NMR Spectrum of 6f**

**
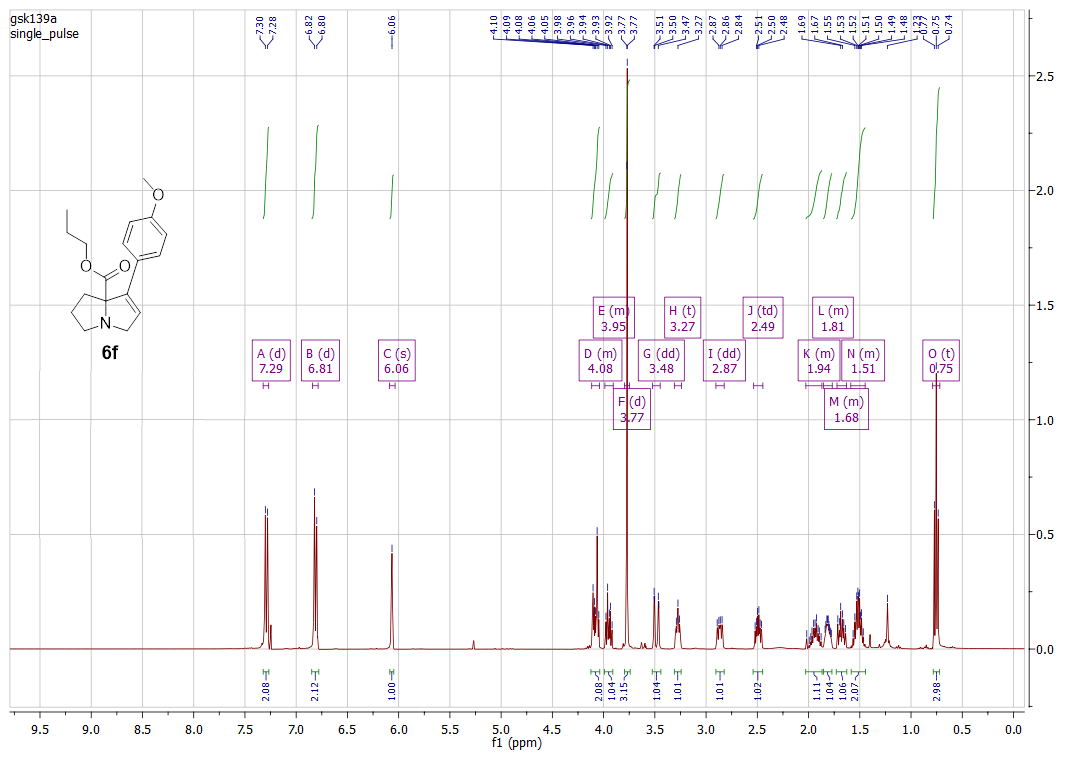
**

**13C-NMR Spectrum of 6f**

**
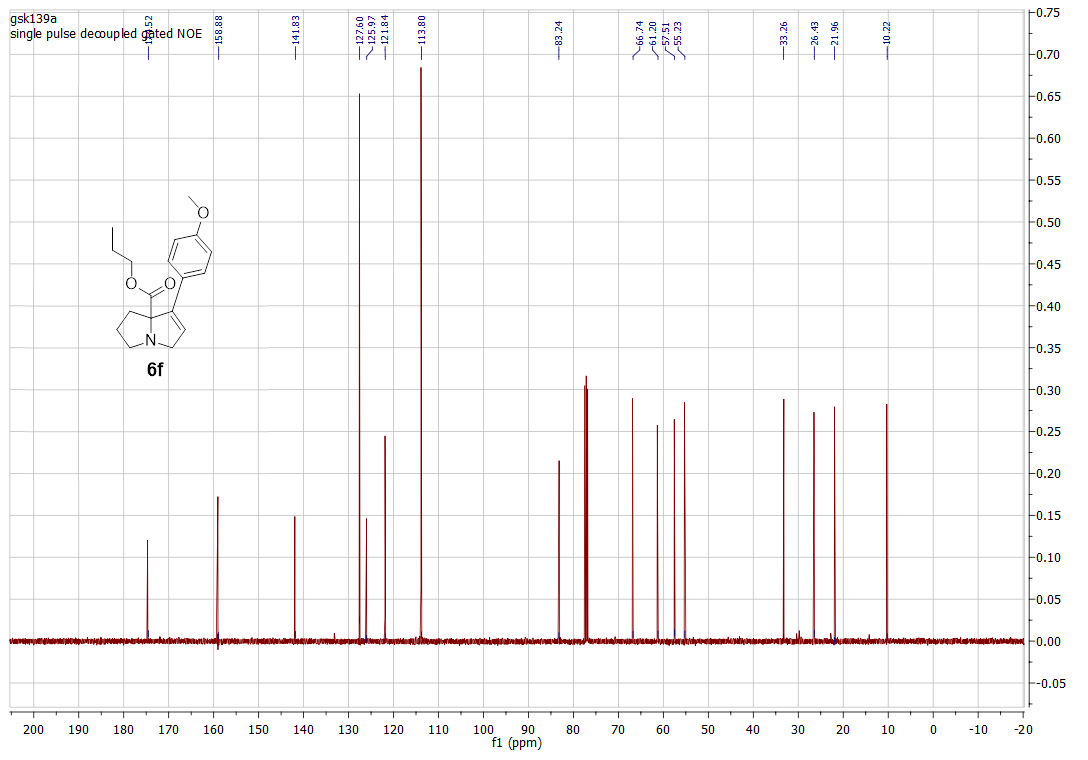
**

**1H-NMR Spectrum of 6g**

**
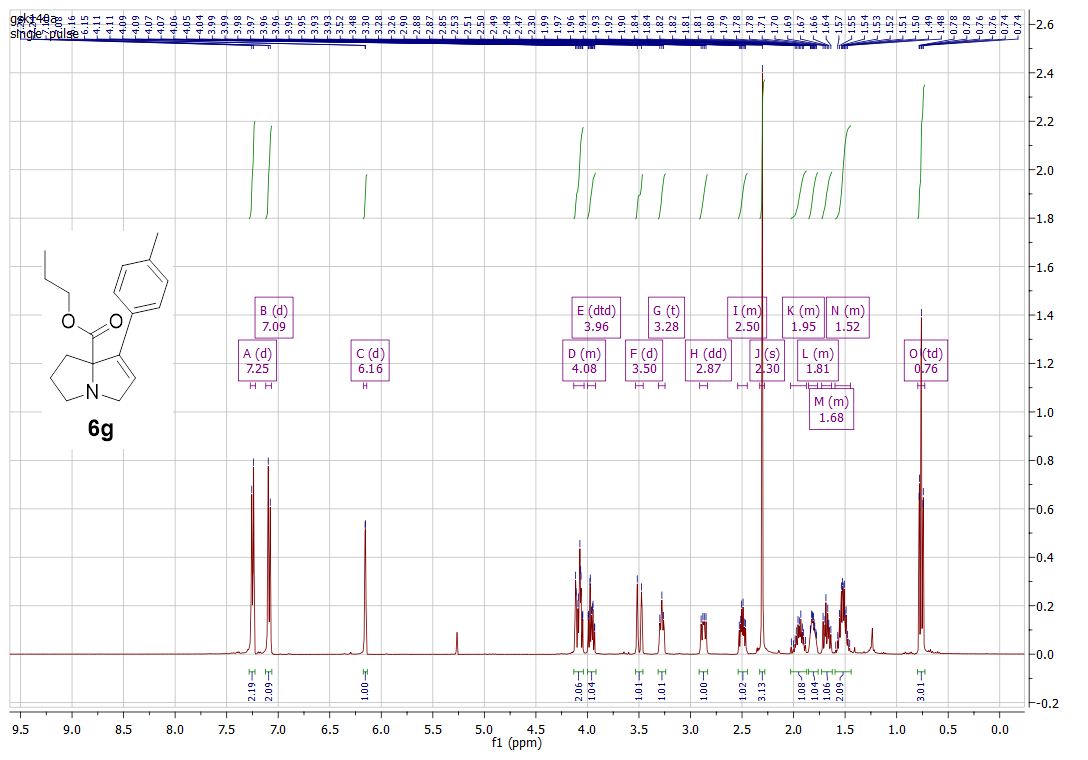
**

**13C-NMR Spectrum of 6g**

**
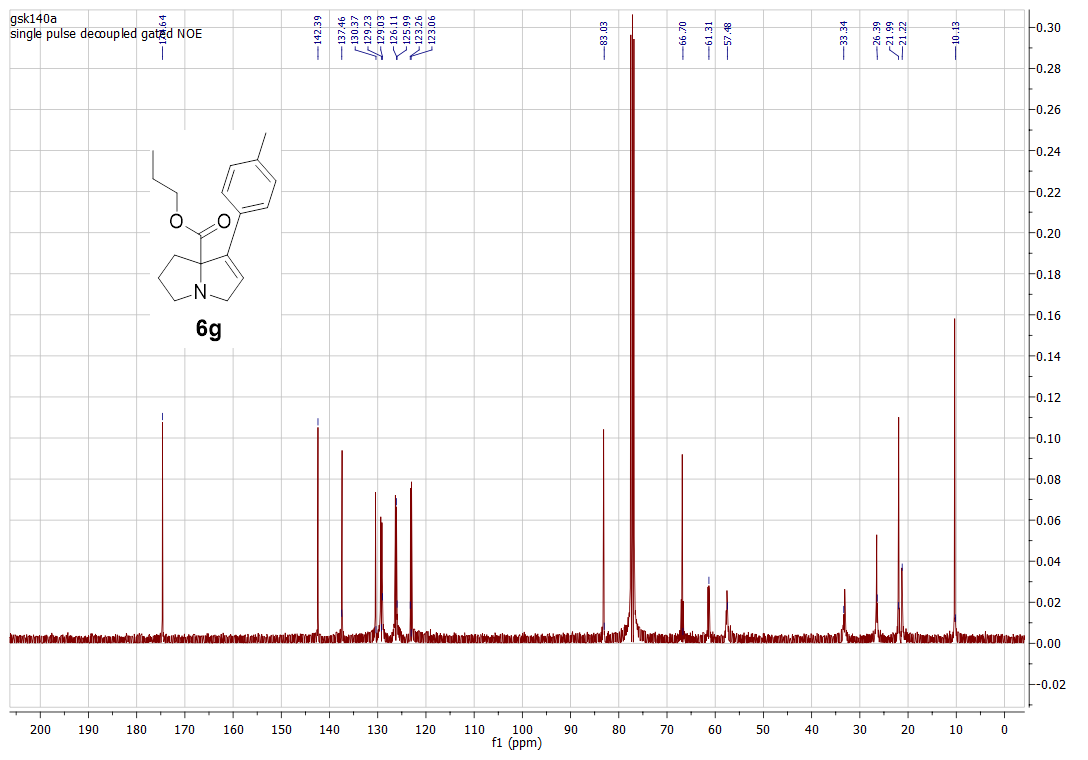
**

**1H-NMR Spectrum of 6h**

**
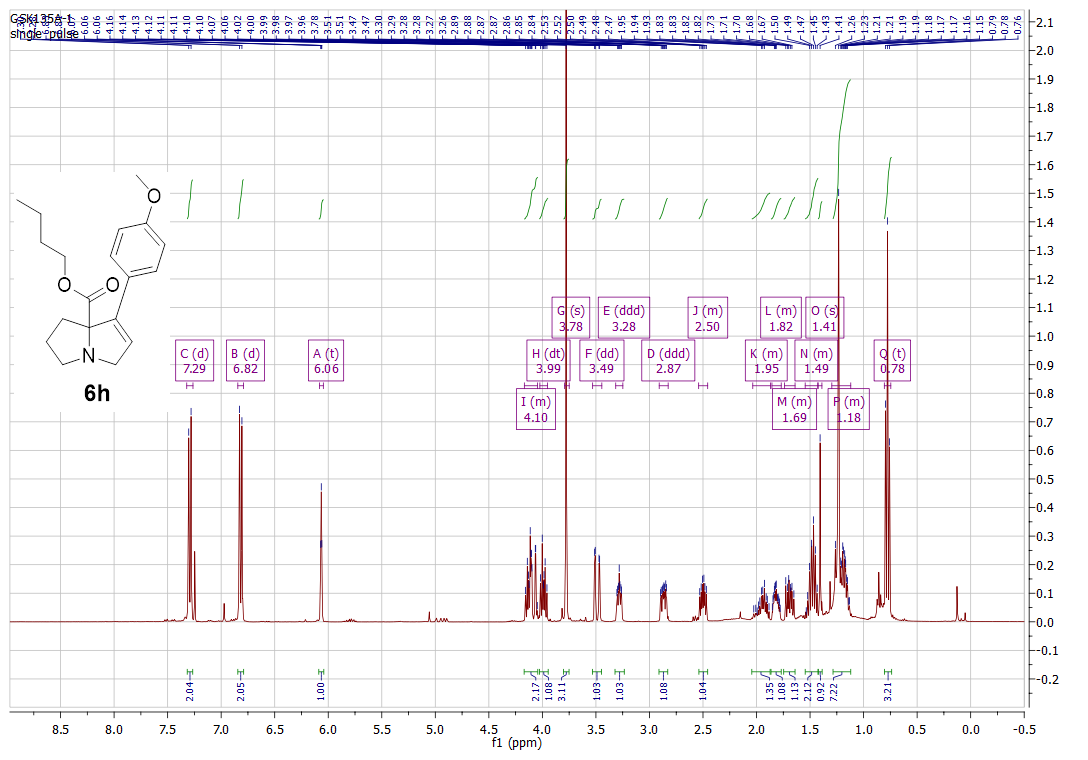
**

**13C-NMR Spectrum of 6h**

**
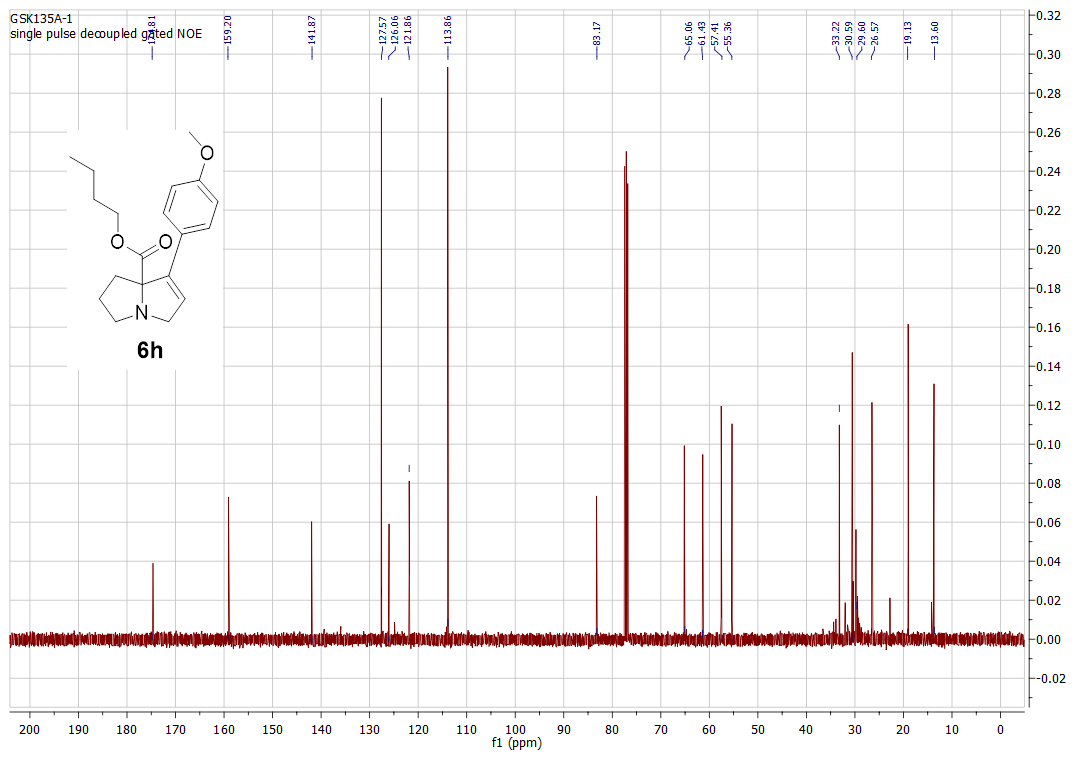
**

**1H-NMR Spectrum of 6i,6i’ isomer mixture**

**
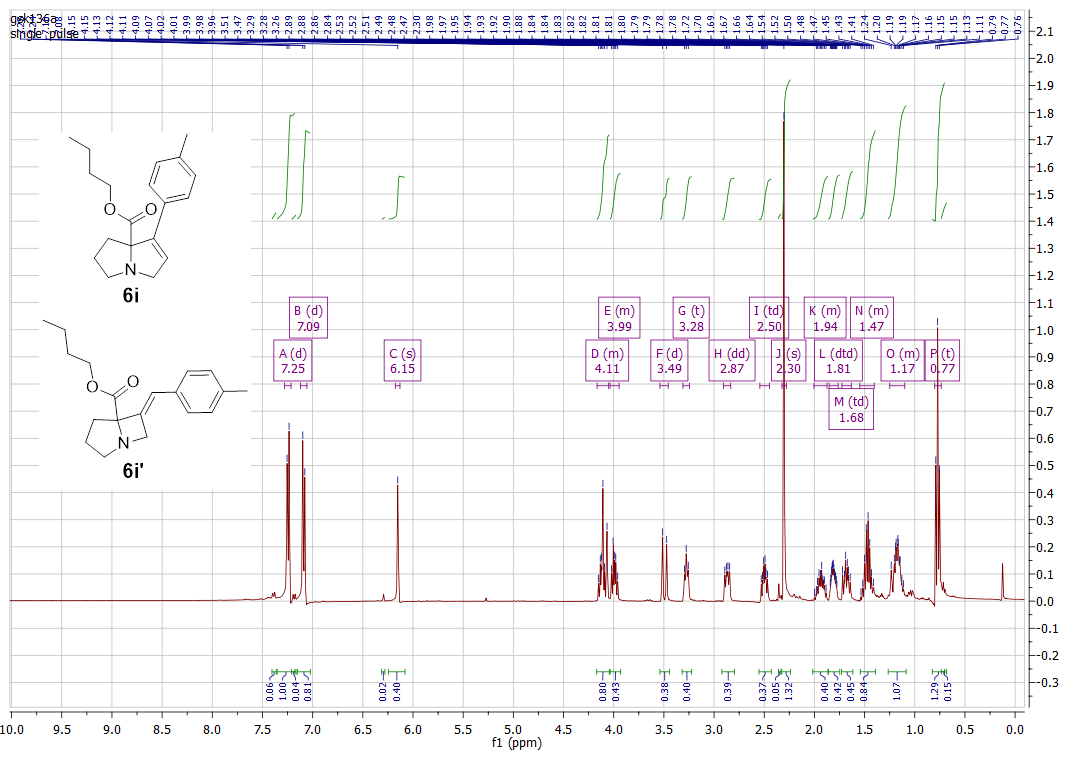
**

**13C-NMR Spectrum of 6i,6i’ isomer mixture**

**
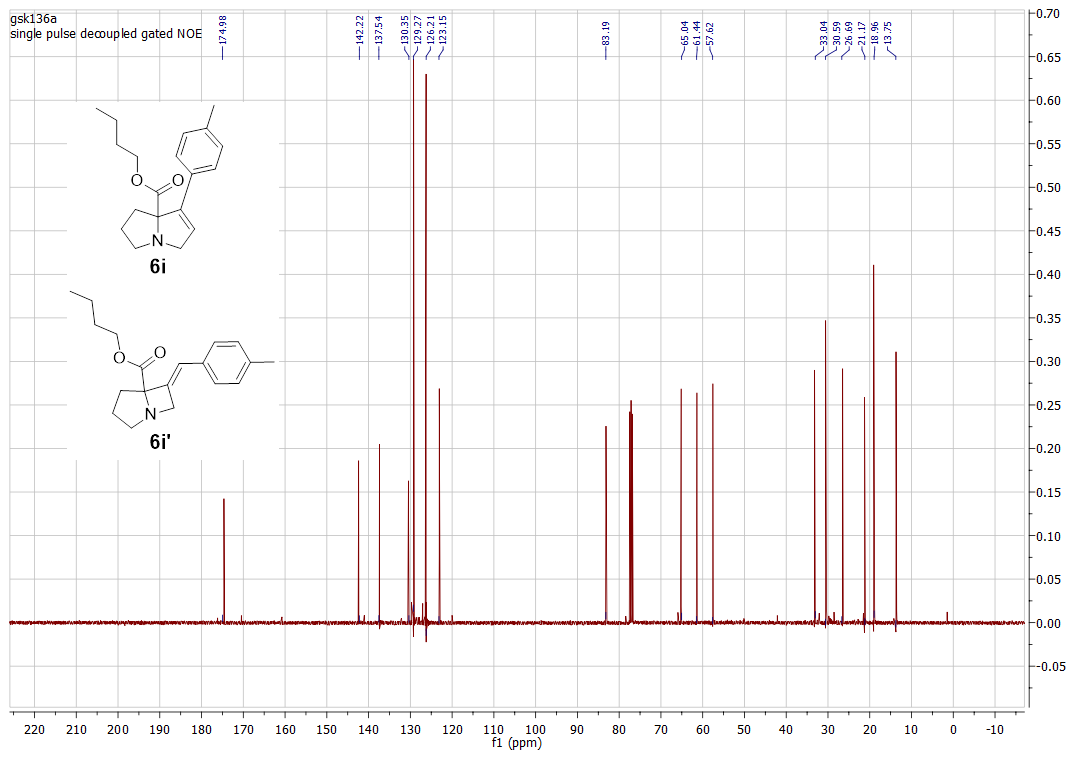
**

**1H-NMR Spectrum of 6j,6j’ isomer mixture**

**
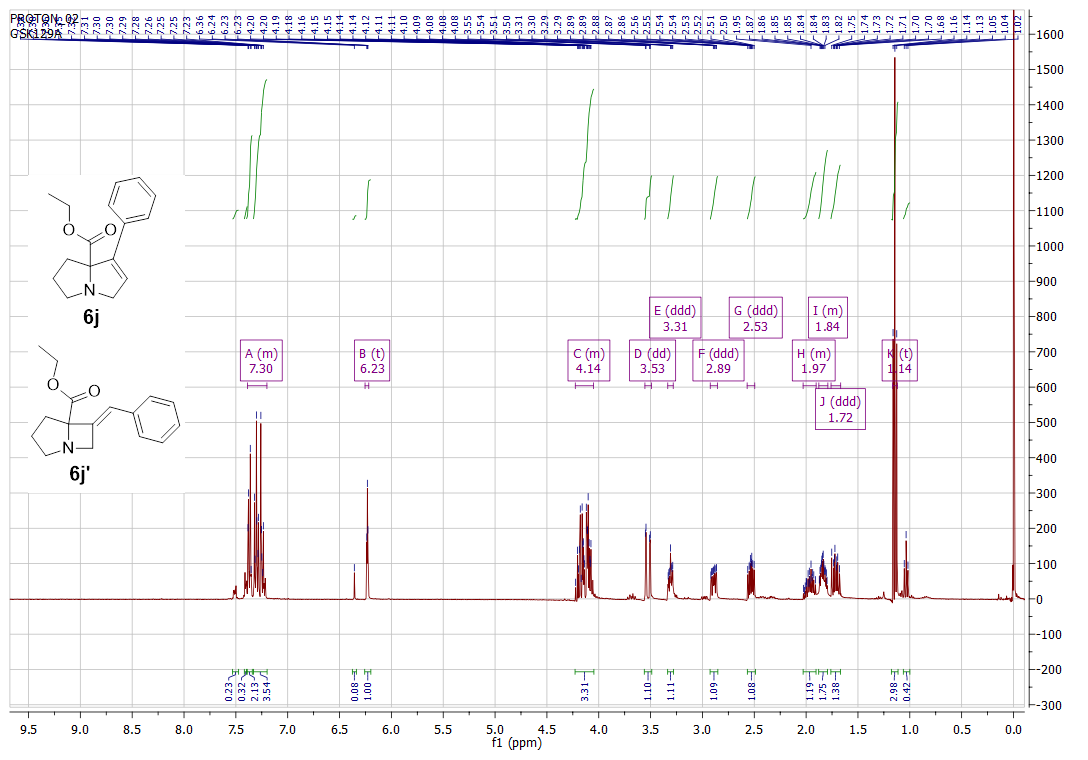
**

**13C-NMR Spectrum of 6j,6j’ isomer mixture**

**
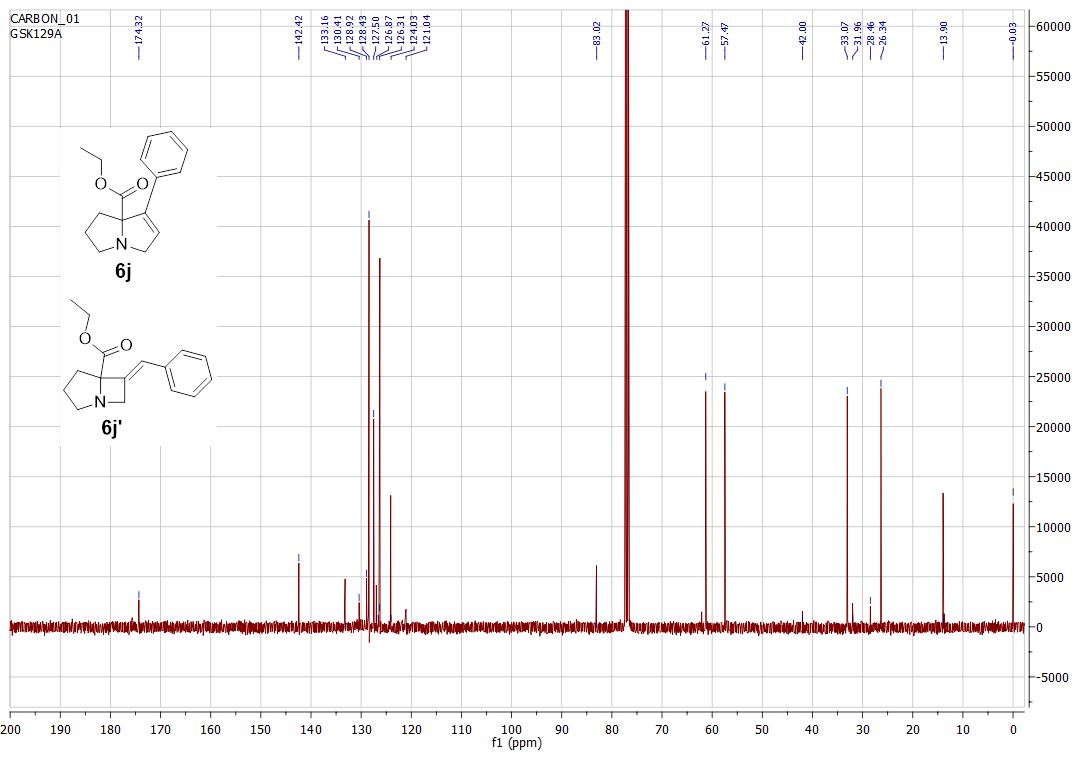
**

**1H-NMR Spectrum of 6k,6k’ isomer mixture**

**
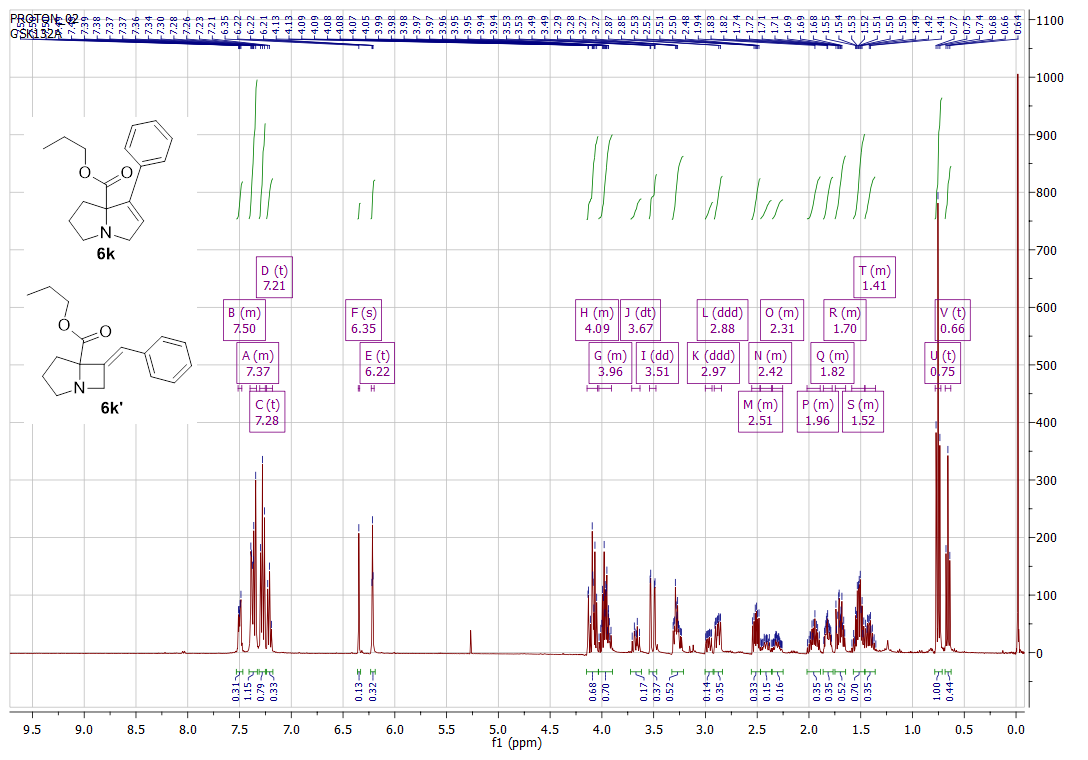
**

**13C-NMR Spectrum of 6k,6k’ isomer mixture**

**
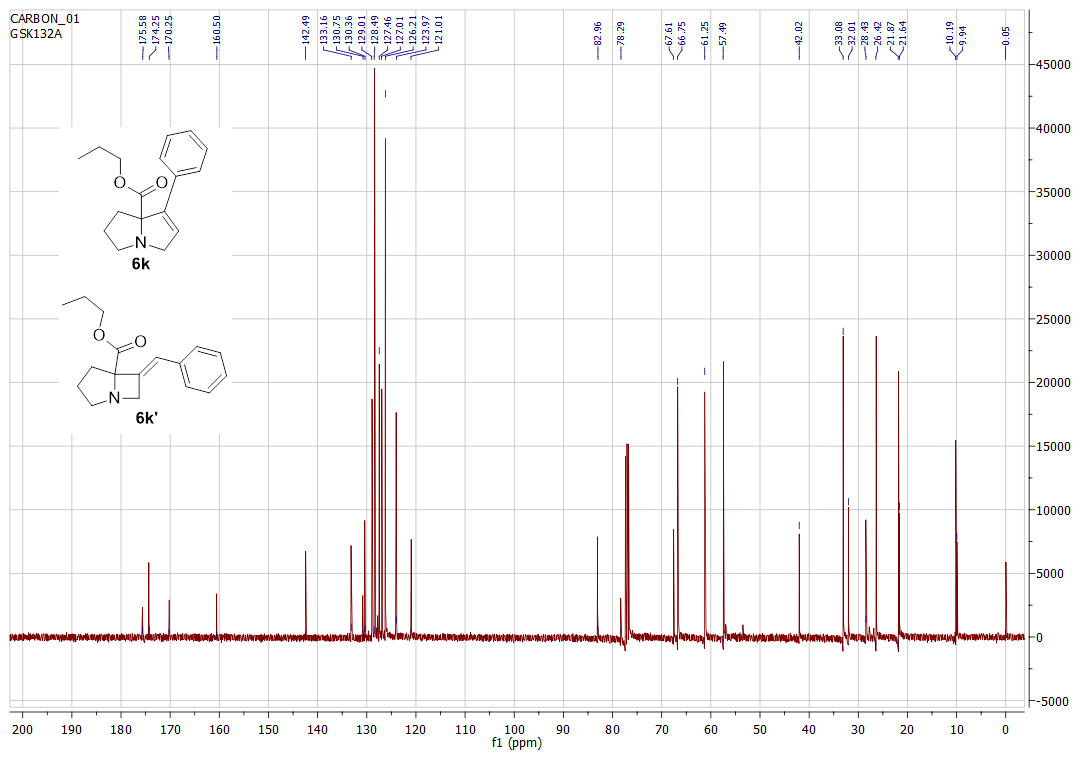
**

**1H-NMR Spectrum of 6l,6l’ isomer mixture**

**
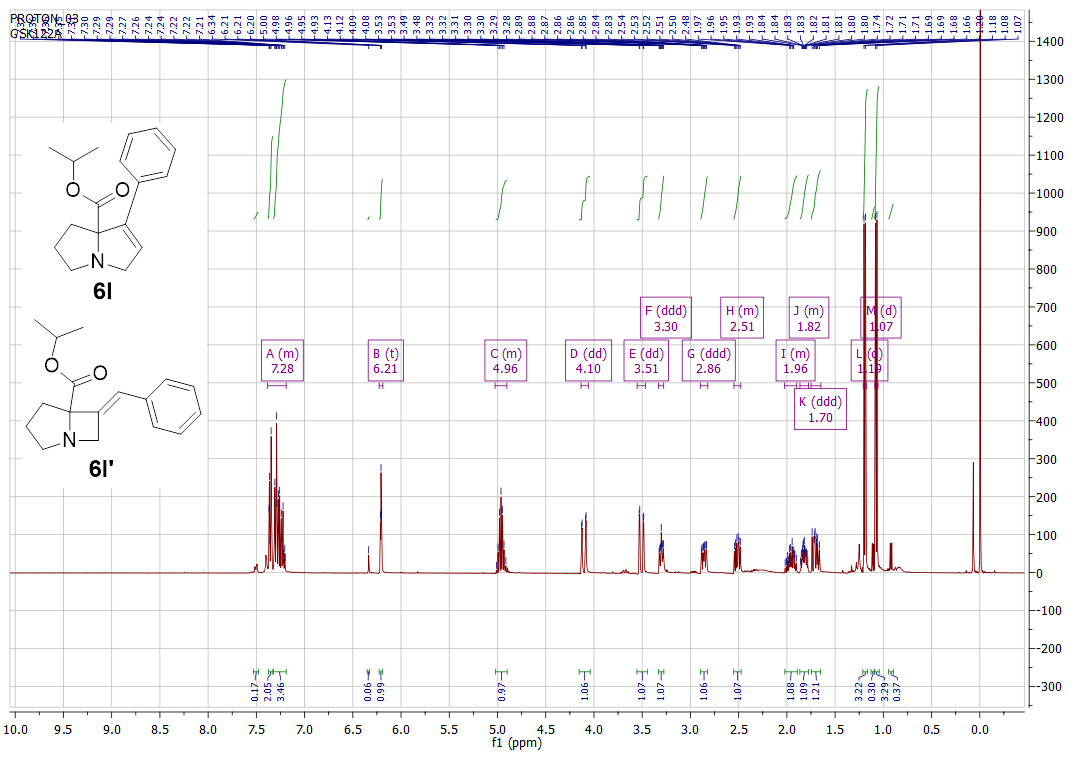
**

**13C-NMR Spectrum of 6l,6l’ isomer mixture**


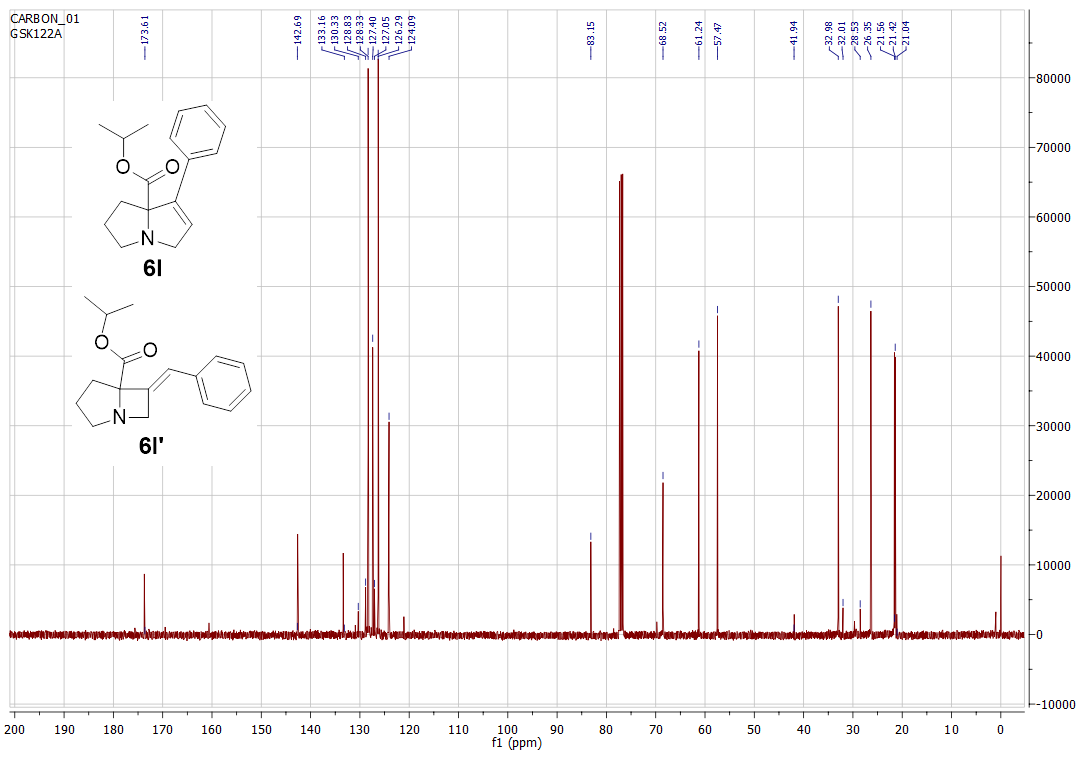


**1H-NMR Spectrum of 6m,6m’ isomer mixture**

**
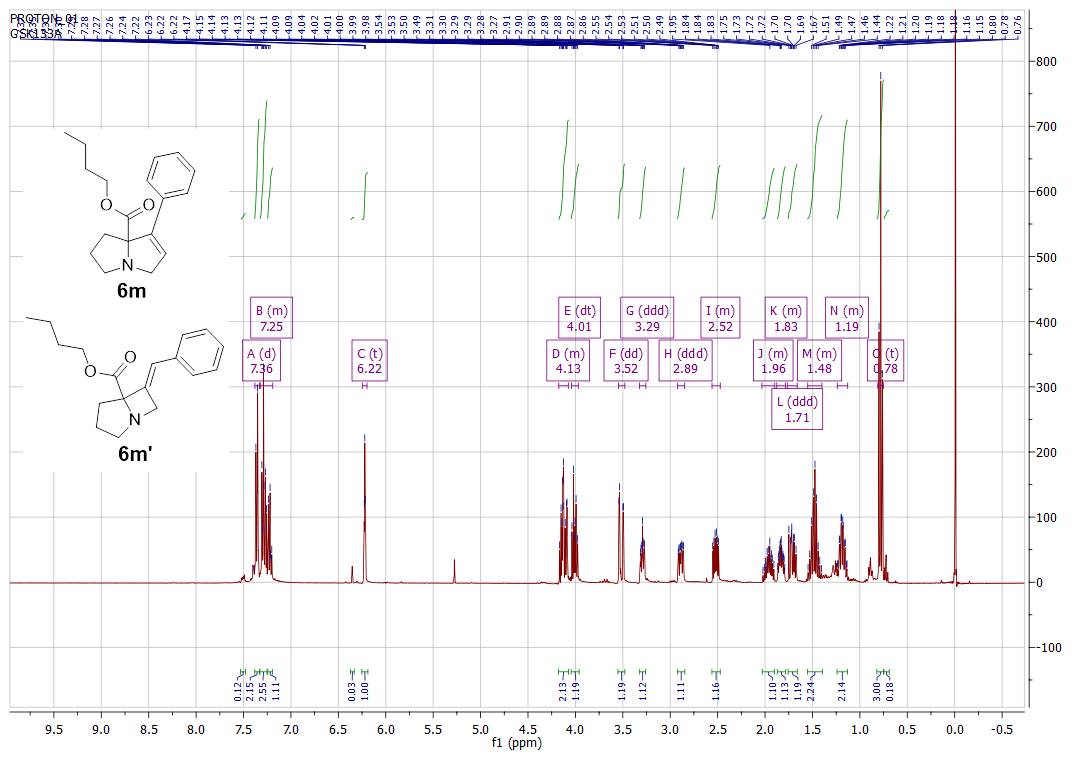
**

**13C-NMR Spectrum of 6m,6m’ isomer mixture**

**
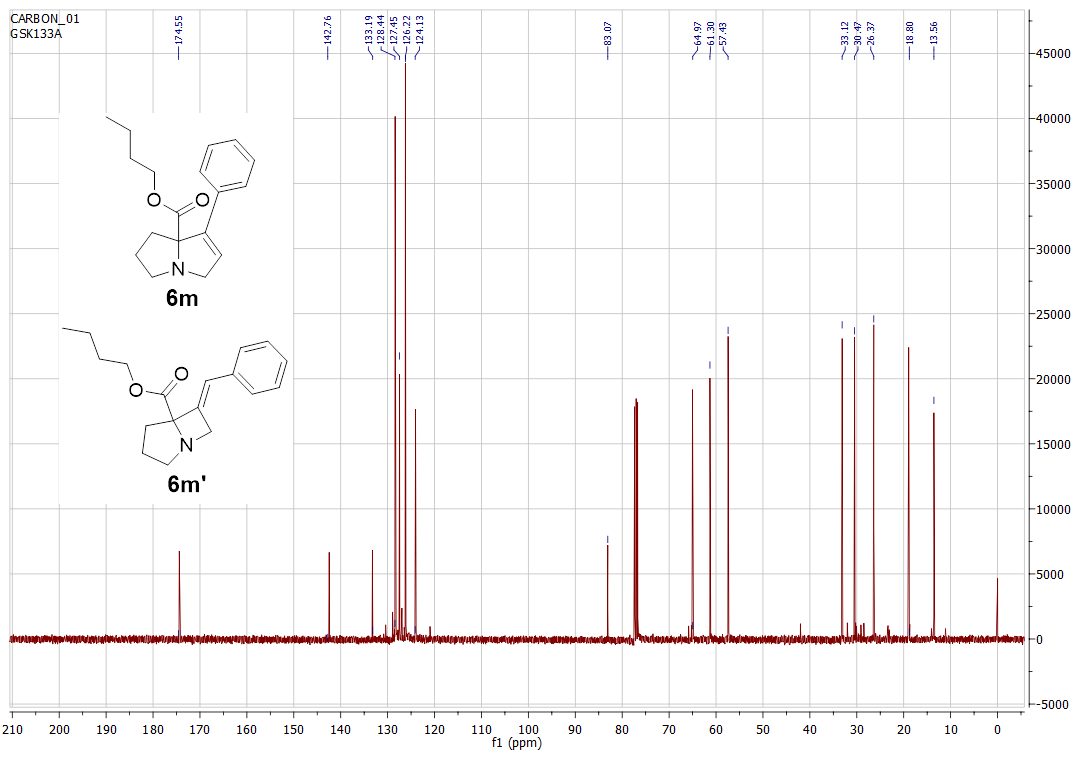
**

**1H-NMR Spectrum of 6n,6n’ isomer mixture**

**
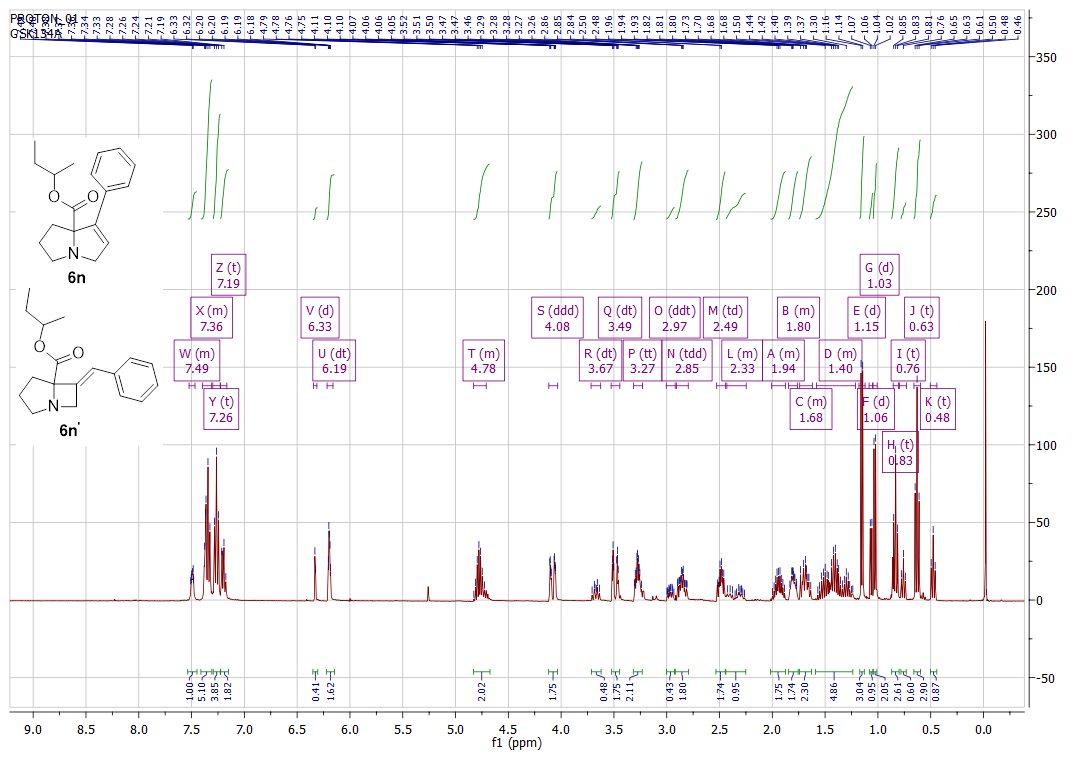
**

**13C-NMR Spectrum of 6n,6n’ isomer mixture**

**
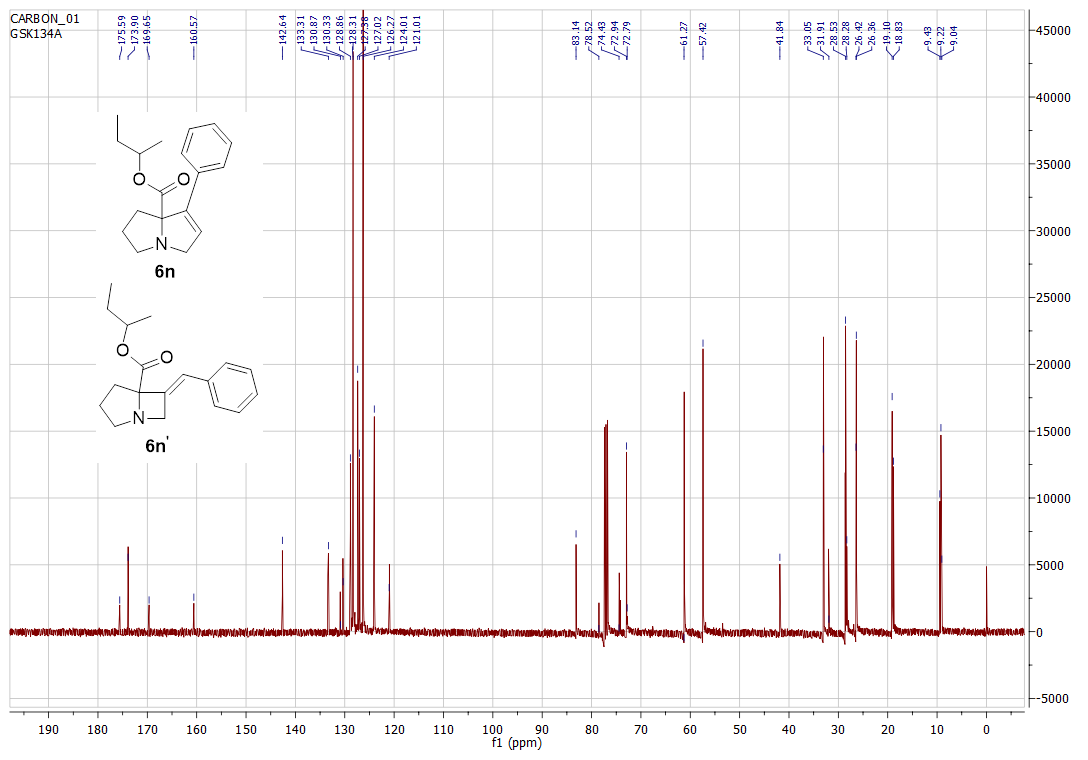
**

**1H-NMR Spectrum of 6o,6o’ isomer mixture**

**
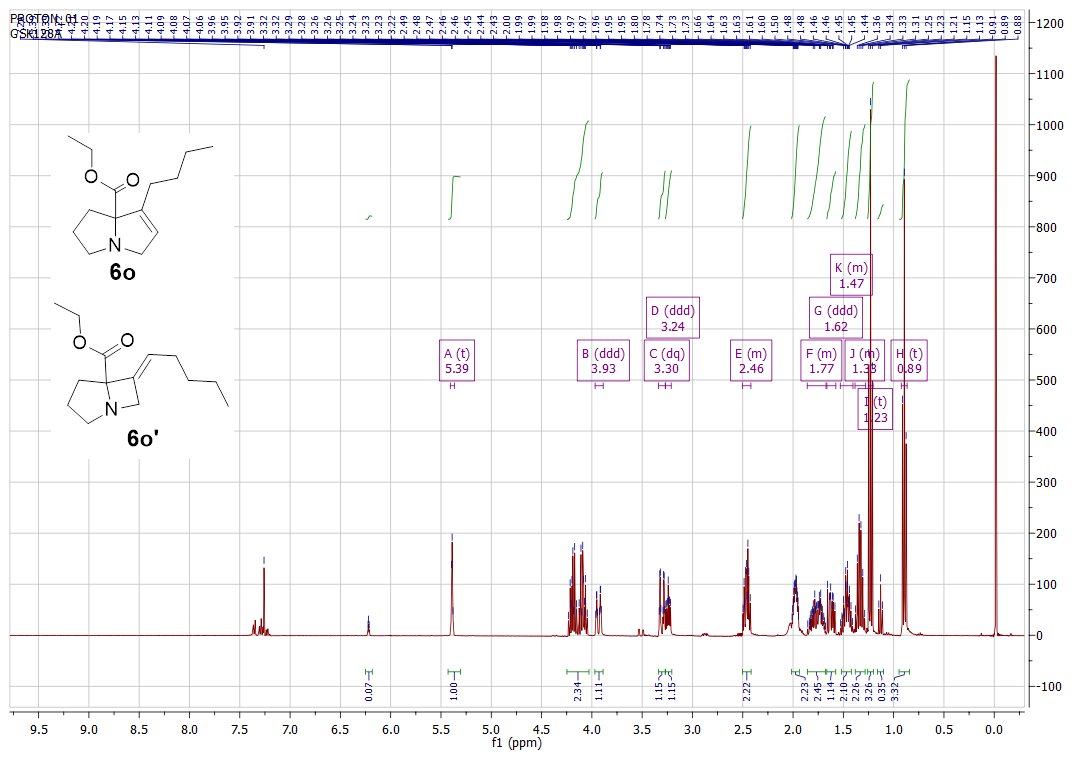
**

**13C-NMR Spectrum of 6o,6o’ isomer mixture**


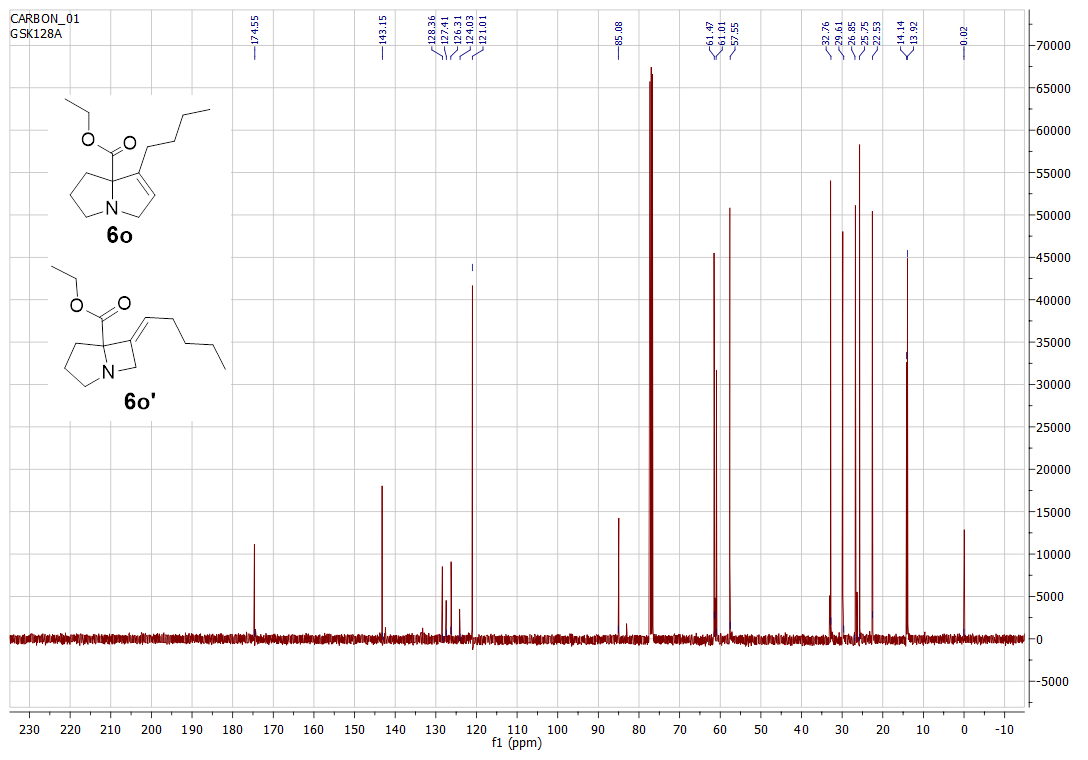


**1H-NMR Spectrum of 6p,6p’ isomer mixture**

**
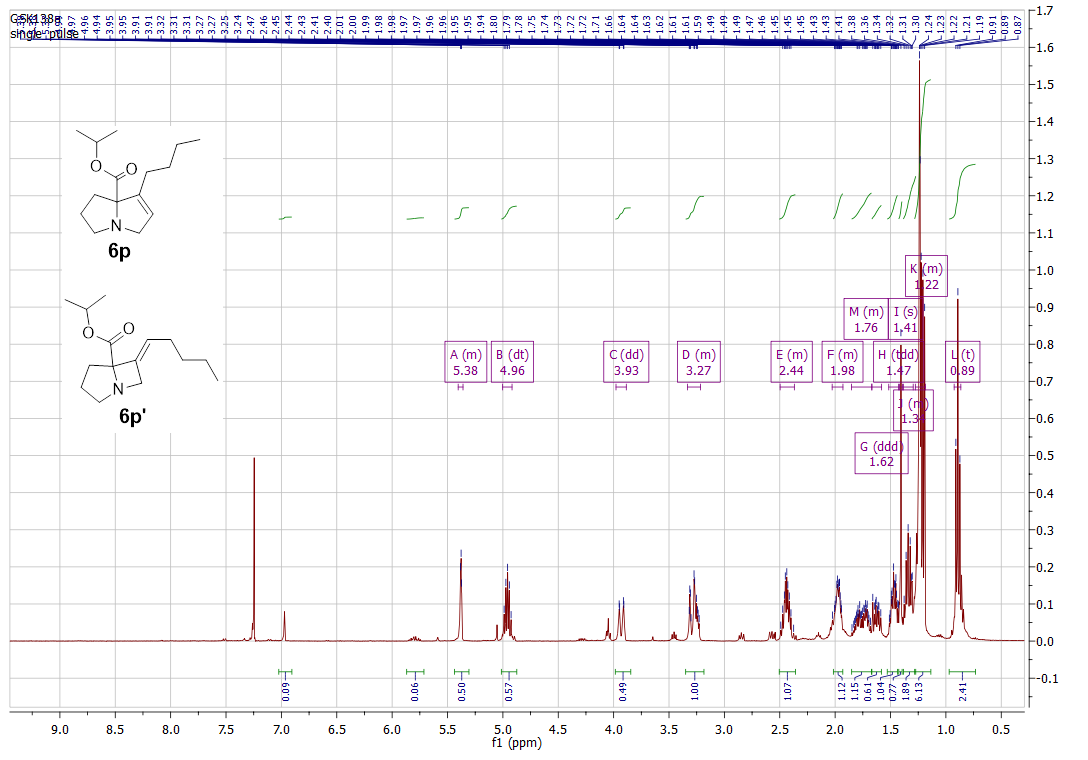
**

**13C-NMR Spectrum of 6p,6p’ isomer mixture**

**
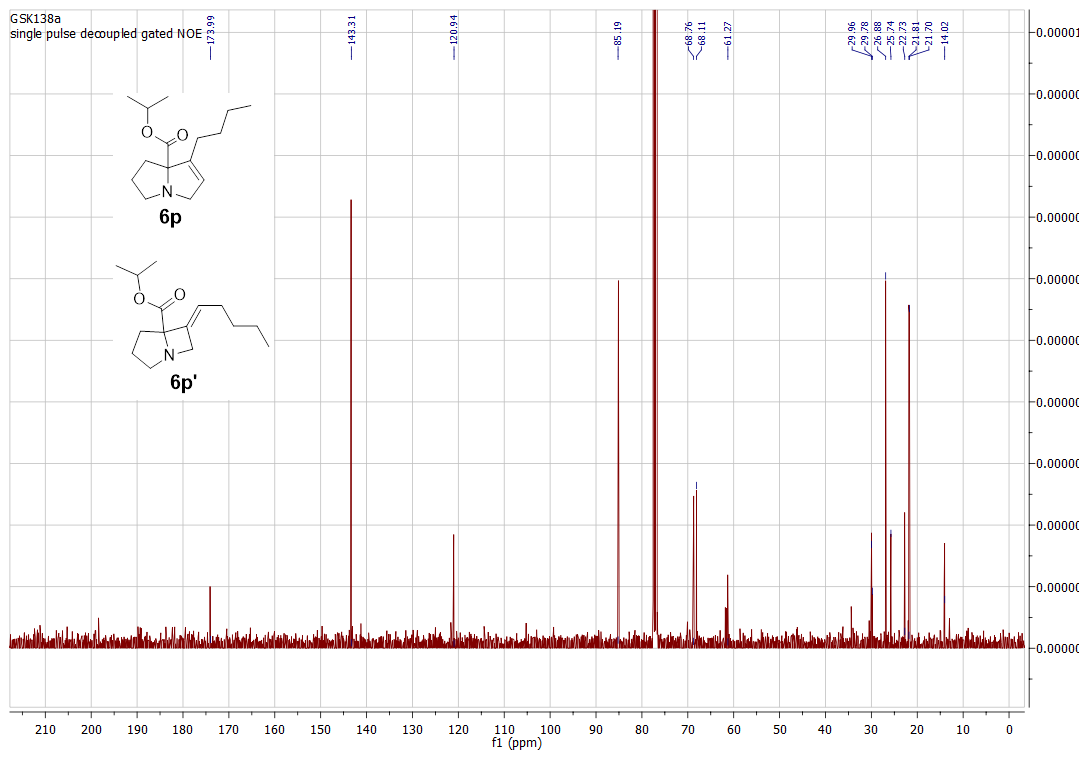
**

**1H-NMR Spectrum of 6r,6r’ isomer mixture**

**
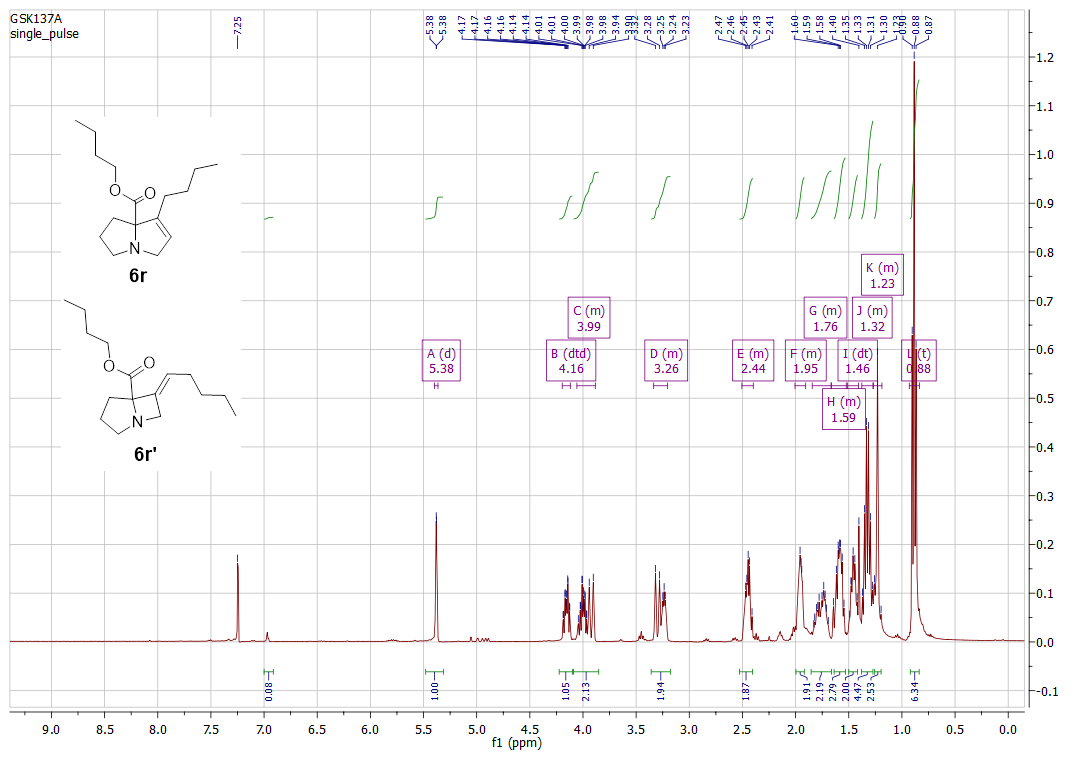
**

**13C-NMR Spectrum of 6r,6r’ isomer mixture**

**
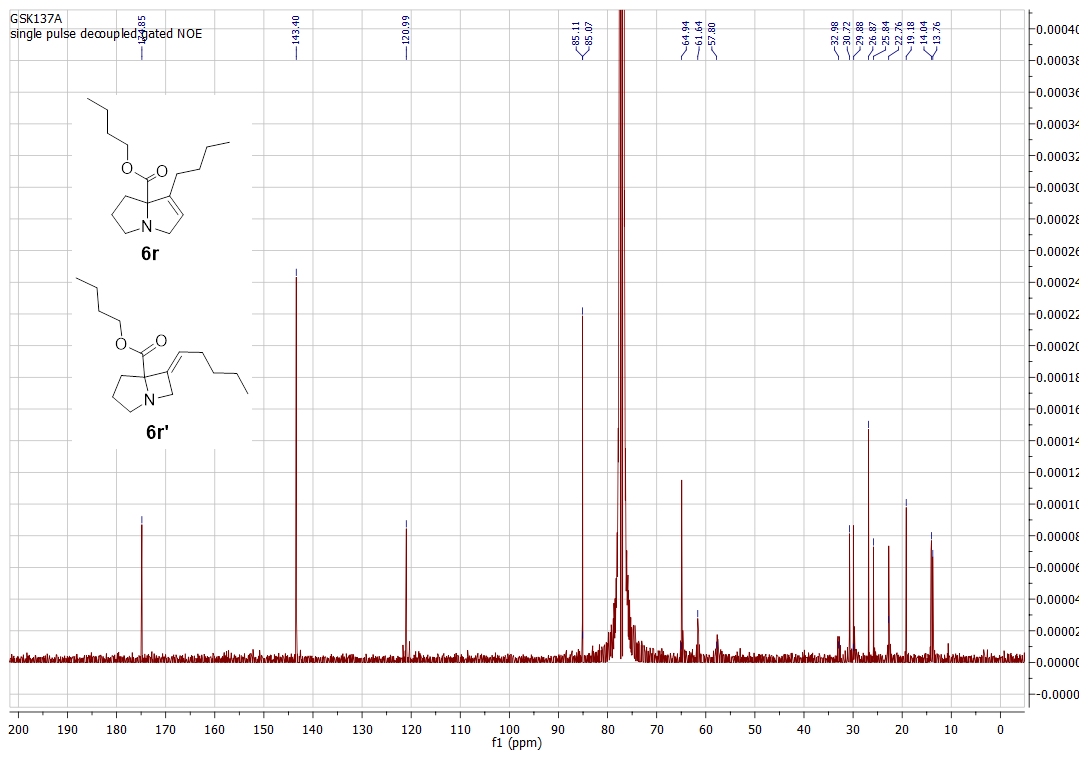
**

**References**

1. Moore, J.L., S.M. Taylor, and V.A. Soloshonok*.* Arkivoc, 2005. **6**: p. 287-292.

2. Alami, M.d., F. Ferri, and G. Linstrumelle*.* Tetrahedron letters, 1993. **34**(40): p. 6403-6406.

3. Bera, K., et al. The Journal of organic chemistry, 2011. **76**(9): p. 3539-3544.

4. Uhlig, N. and C.-J. Li*.* Organic letters, 2012. **14**(12): p. 3000-3003.

5. Shi, L., et al. Organic letters, 2004. **6**(6): p. 1001-1003.
